# Supplementary material for: Unexpected reactivity of graphene oxide with DBU and DMF
Source: Royal Society of Chemistry journal article supplement (doi:10.1039/c8ta03529f), 2018-01-01
Supplement: c8ta03529f1.pdf [file c8ta03529f1.pdf]

# Unexpected Reactivity of Graphene Oxide with DBU and DMF

Rafael Ramírez-Jiménez,<sup>a</sup> Mario Franco,<sup>a</sup> Eduardo Rodrigo,<sup>a</sup> Raquel Sainz,<sup>b</sup> Rafael Ferritto,<sup>b</sup>  
Al Mokhtar Lamsabhi,<sup>c,d</sup> José Luis Aceña\*<sup>e</sup> and M. Belén Cid\*<sup>a,d</sup>

<sup>a</sup>. Department of Organic Chemistry, Universidad Autónoma de Madrid, Cantoblanco, 28049 Madrid (Spain), E-mail: belen.cid@uam.es.

<sup>b</sup>. NanoInnova Technologies SL., Parque Científico de Madrid, C/Faraday, 7, 28049 Madrid (Spain).

<sup>c</sup>. Department of Chemistry, Universidad Autónoma de Madrid, Cantoblanco, 28049 Madrid (Spain)

<sup>d</sup>. Institute for Advanced Research in Chemical Sciences (IAdChem), Universidad Autónoma de Madrid, 28049 Madrid, Spain.

<sup>e</sup>. Departament of Organic and Inorganic Chemistry, Chemical Research Institute "Andrés M. del Río" (IQAR), Universidad de Alcalá, Alcalá de Henares, 28871 Madrid (Spain), E-mail: jose.acena@uah.es.

## Electronic Supplementary Information

### Table of contents

|                                                                |            |
|----------------------------------------------------------------|------------|
| <b>1.- General methods</b>                                     | <b>S2</b>  |
| <b>2.- Attempt to anchor alcohols via epoxide ring opening</b> | <b>S3</b>  |
| <b>3.- Synthesis of amine 1</b>                                | <b>S3</b>  |
| <b>4.- Characterization of materials B-F and A'</b>            |            |
| • <b>Material B</b>                                            | <b>S4</b>  |
| • <b>Material C</b>                                            | <b>S6</b>  |
| • <b>Material D</b>                                            | <b>S7</b>  |
| • <b>Material E</b>                                            | <b>S9</b>  |
| • <b>Material F</b>                                            | <b>S11</b> |
| • <b>Material A'</b>                                           | <b>S13</b> |
| • <b>Comparison of data of materials B-F and discussion</b>    | <b>S15</b> |
| <b>5. Mechanistic Studies</b>                                  | <b>S19</b> |
| <b>6. pH measurements</b>                                      | <b>S20</b> |
| <b>7. Comparison IR between theory and Experiments</b>         | <b>S20</b> |
| <b>8. Cartesian Coordinates of the optimized complexes</b>     | <b>S21</b> |

## **1. General methods**

NMR spectra were acquired using CDCl<sub>3</sub> as solvent, running at 300 and 75 MHz for <sup>1</sup>H and <sup>13</sup>C, respectively. Chemical shifts (δ) are reported in ppm relative to residual solvent signals (CDCl<sub>3</sub>, 7.26 ppm for <sup>1</sup>H NMR, and 77.0 ppm for <sup>13</sup>C NMR). In all <sup>1</sup>H NMR spectra, multiplicity is indicated as follows: bs (broad singlet), s (singlet), d (doublet), t (triplet), q (quartet) or m (multiplet). Coupling constant values (in Hertz) and number of protons for each signal are also indicated.

For thin layer chromatography (TLC) Supelco silica gel plates with fluorescence indicator 254 nm were used and compounds were visualized by irradiation with UV light and/or by treatment with a solution of KMnO<sub>4</sub> (1.5 g), K<sub>2</sub>CO<sub>3</sub> (10 g), and 10% NaOH (1.25 mL) in H<sub>2</sub>O (200 mL) or a solution of phosphomolybdic acid (12 g), in EtOH (250 mL) followed by heating. Flash column chromatography (FCC) was performed using Merck pore 60 Å, 40-63 μm silica gel and compressed air.

FTIR essays were carried out in a Bruker IFS66v spectrometer (KBr, 99%).

Thermogravimetric analyses (TGA) were performed using a TGA Q-500 (TA Instruments) at 5 °C/min (from 25 °C to 900 °C) under nitrogen atmosphere. Elemental analyses were performed using a Leco CHNS- 932.

Photoelectron spectra (XPS) were obtained with a VG Escalab 200R spectrometer equipped with a hemispherical electron analyser and a Mg Kα (hν = 1254.6 eV) X-ray source, powered at 120 W. Binding energies were calibrated relative to the C 1s peak at 284.8 eV. High-resolution spectra envelopes were obtained by curve fitting synthetic peak components using the software "XPS peak." Symmetric Gaussian–Lorentzian curves were used to approximate the line shapes of the fitting components. Atomic ratios were computed from experimental intensity ratios and normalized by atomic sensitivity factor.

pH values were measured at open air, using a Crison pH-meter 25+ apparatus, at 25 °C.

Cyclohexane and EtOAc were supplied by *Carlo Erba* and were used without previous purification. All the other reactants were bought in *Aldrich*, *Fluka* or *Alfa Aesar*. All synthesized products are described and spectroscopic data are consistent with the references indicated next to the name of each compound.

Graphene oxide (GO) was synthesized using a modified Hummers' method.<sup>1</sup>

---

<sup>1</sup> W. S. Hummers and R. E. Offeman, *J. Am. Chem. Soc.*, 1958, **80**, 1339.

## 2. Attempt to anchor alcohols via epoxide ring opening

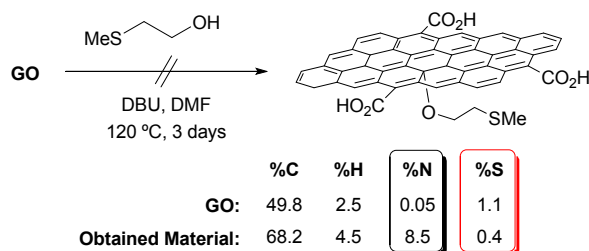

A solution of 2-(methylthio)ethanol (0.94 mL, 1 g, 10.85 mmol) in DMF (50 mL) was added to a dispersion of GO (500 mg) in DMF (50 mL), previously treated in an ultrasound bath for 30 minutes, followed by DBU (1.63 mL, 1.66 g, 10.85 mmol). The mixture was heated in a sealed tube for 3 days, after which the material was filtered and washed successively with deionized water (3 x 15 mL), MeOH (30 mL) and acetone (30 mL). The obtained material was left to stir in a vial tube at 70 °C for 3 days.

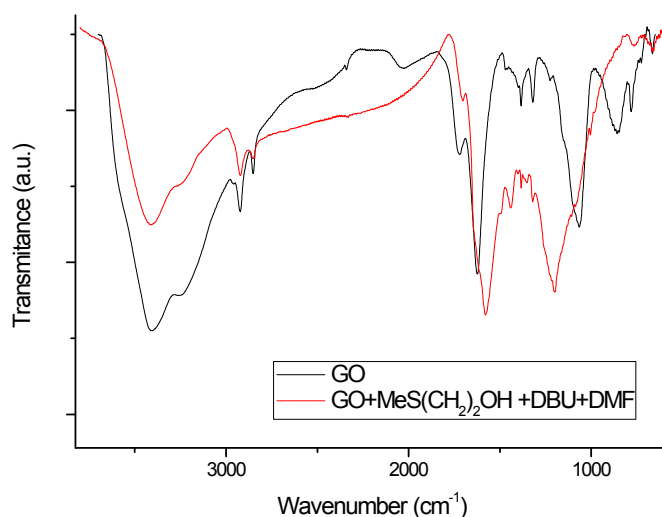

## 3. Synthesis of amine 1

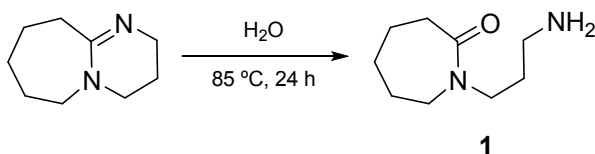

A mixture of DBU (2.23 mL, 2.28 g, 15 mmol) and water (0.27 mL, 0.27 g, 15 mmol) was stirred at 85 °C for 24 h. Then, the mixture was extracted with CH<sub>2</sub>Cl<sub>2</sub> (5 mL), dried over MgSO<sub>4</sub> and the organic solvent was removed under reduced pressure. The crude was purified by FCC (CHCl<sub>3</sub>/MeOH/conc. NH<sub>3</sub>, 9:1:1, and then CHCl<sub>3</sub>/MeOH, 4:1) to afford compound 1. Its characterization data were in agreement with those reported in the literature.<sup>2</sup>

<sup>2</sup> A. Kraft, *J. Chem. Soc., Perkin Trans. 1*, 1999, 705.

#### 4.- Characterization of Materials B-F and A'

- Data of Material B (GO + DMF)

Elemental analysis: %C: 77.4, % H: 1.5; % N: 2.8, %S: 0.03.

$^{13}\text{C}$  NMR (Top, in red) and its comparison with  $^{13}\text{C}$  NMR of GO (Bottom, green):

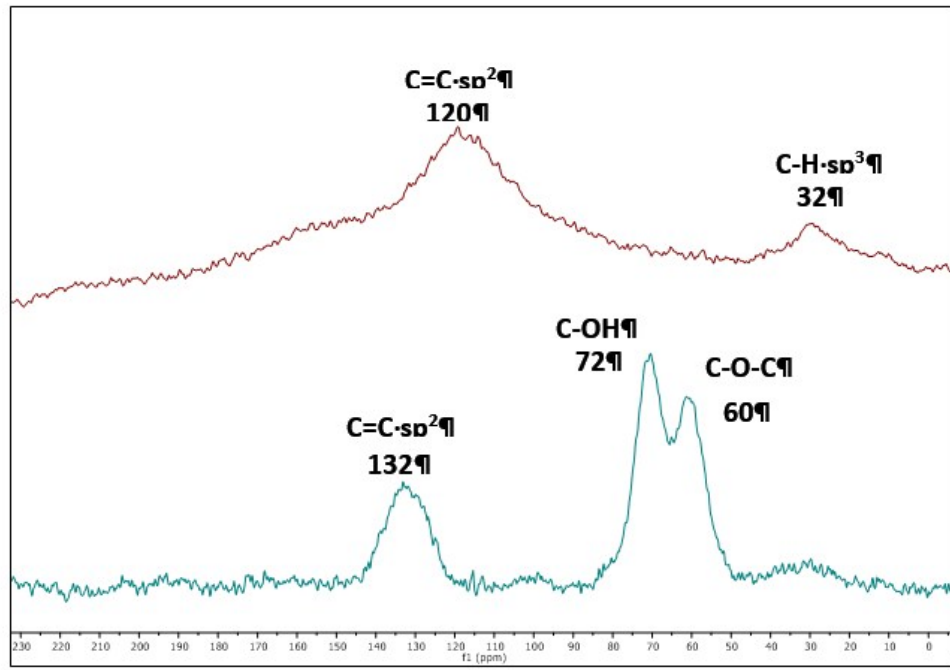

TGA:

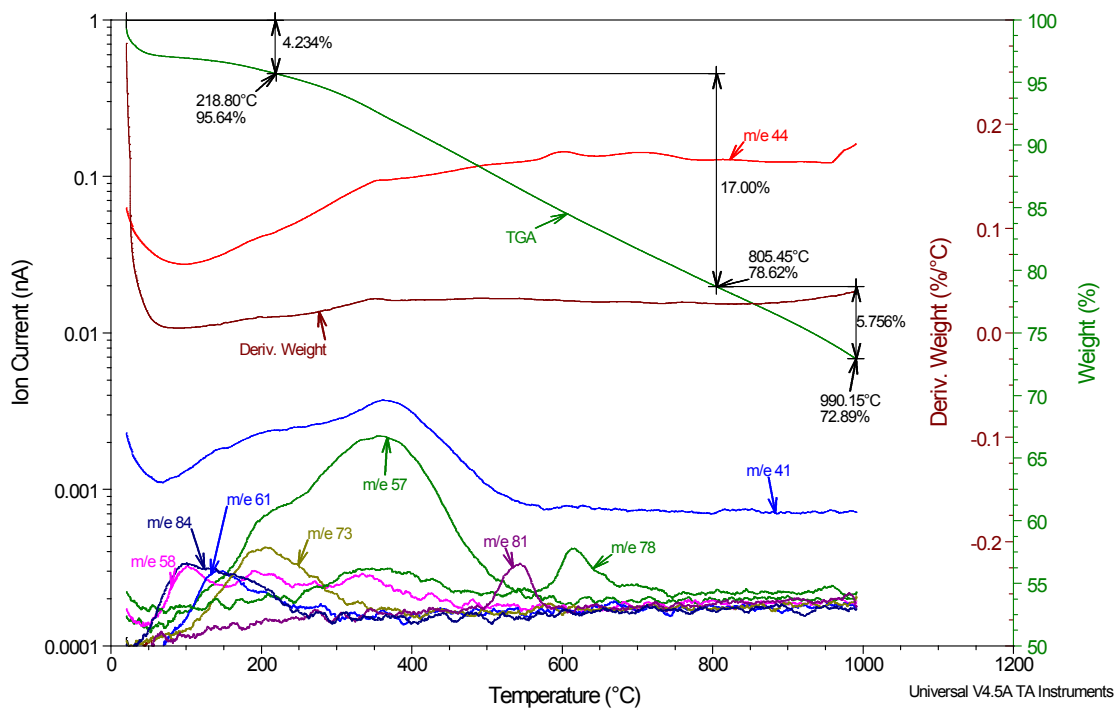

**FTIR:**

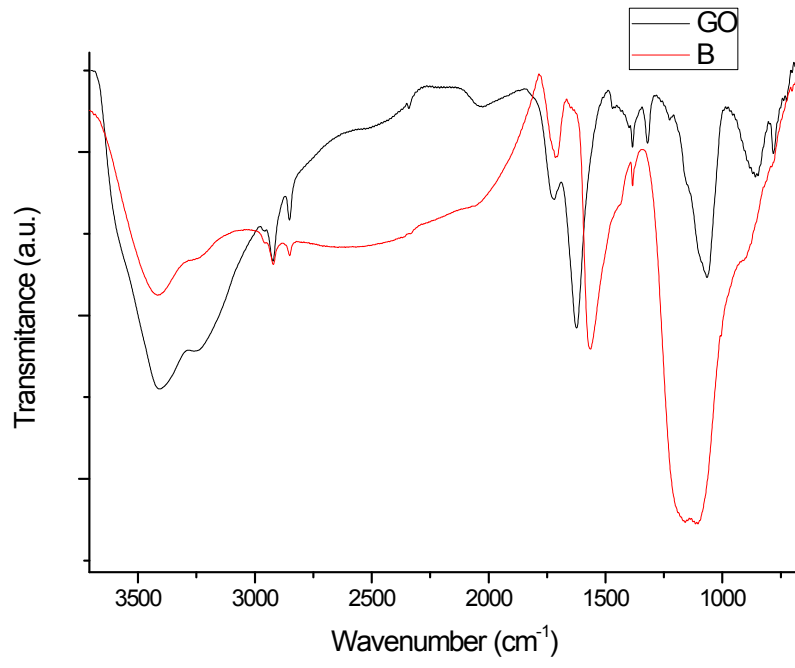

- **Data of Material C (GO + DBU in THF)**

**Elemental analysis:** %C: 60.2, %H: 4.5, %N: 4.5, %S: 0.1

**Elemental analysis (After washing with a 2M NaOH solution, material C'):** %C: 40.0; %H: 2.2; %N: 0.47; %S: 0.021.

**FTIR:**

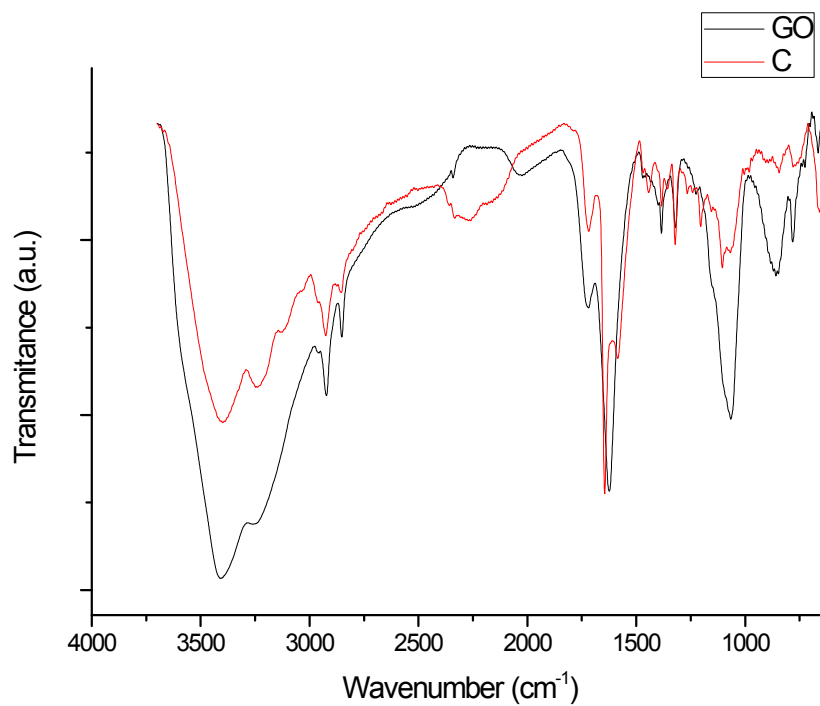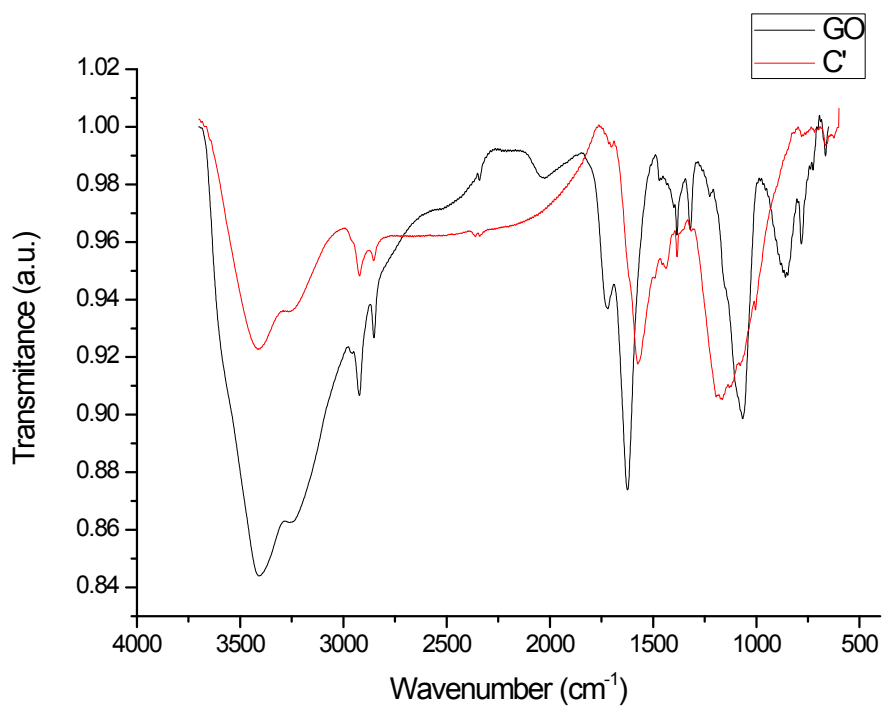

- **Data of Material D (GO + DBU in DMF)**

**Elemental analysis:** %C: 68.1; %H: 3.9; %N: 8.0 % S: 0.01

<sup>13</sup>C NMR (Top, in red) and its comparison with <sup>13</sup>C NMR of GO (Bottom, green).

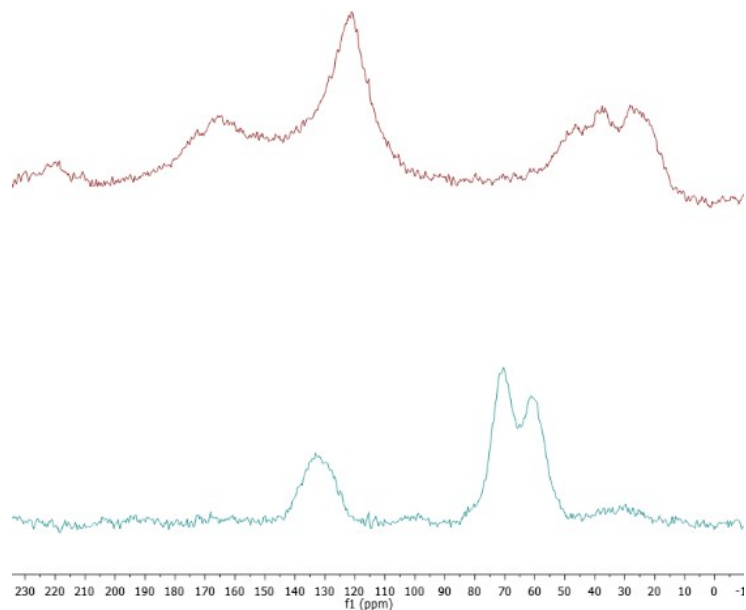

**TGA:**

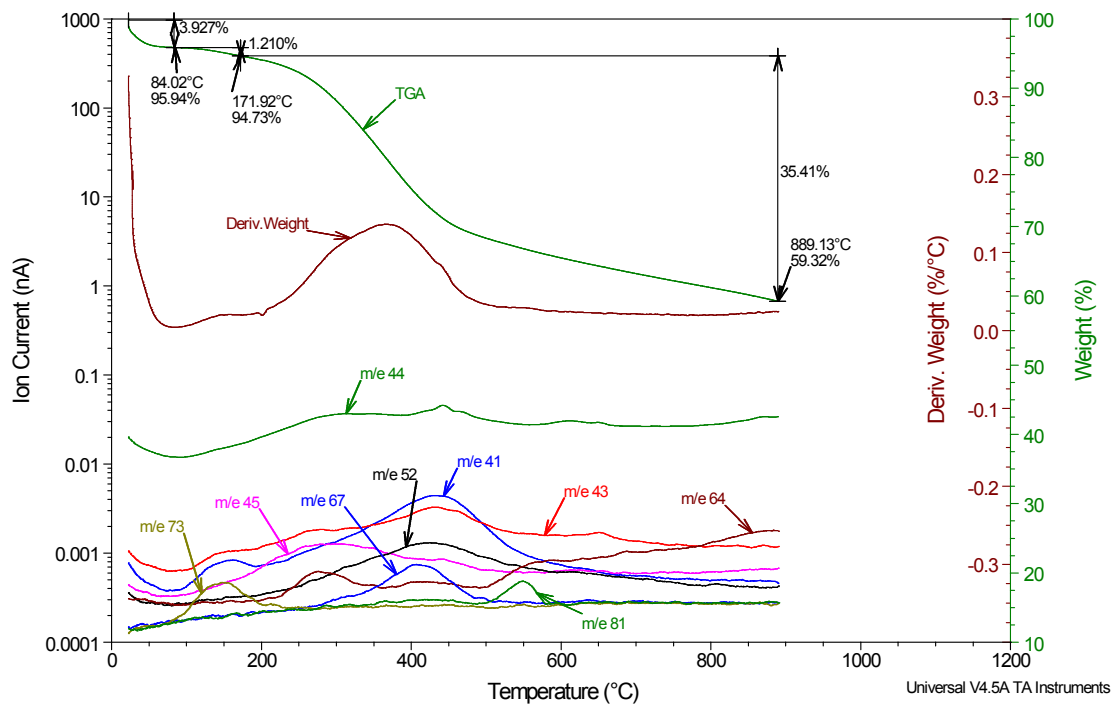

## FTIR:

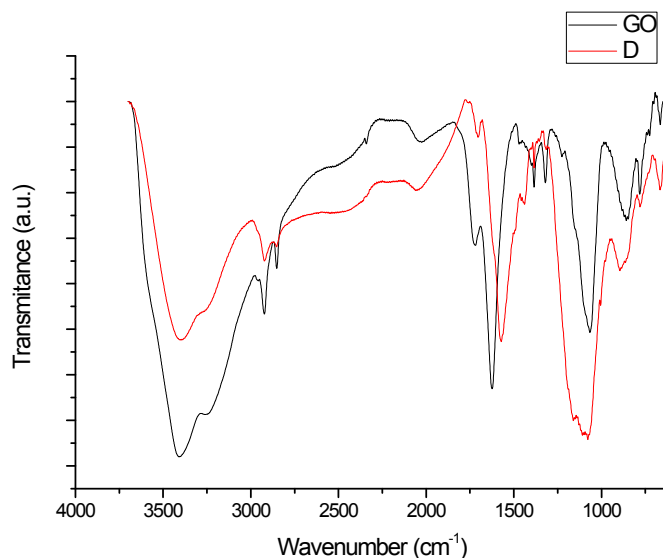

When we performed the reaction of GO with DBU in DMF under the same conditions used to obtain material **D** at 80 °C (4 days), we did not detect compound **2** by  $^1\text{H}$  NMR analysis. According to the elemental analysis of the material (**G**), some nitrogen has been incorporated. This incorporation of nitrogen agrees with the fact that we do not recover an 8 % of the mass of the starting DBU in the reaction. Below is also shown the solid  $^{13}\text{C}$  NMR and IR spectra of this material. These data agree with an incorporation of hydrolyzed DBU (**1**) at 80 °C (formation of **1** is energetically favored according to our calculations) but lower incorporation of  $-\text{NMe}_2$  than when the reaction is performed at 120 °C (formation of  $\text{HNMe}_2$  is less favored energetically).

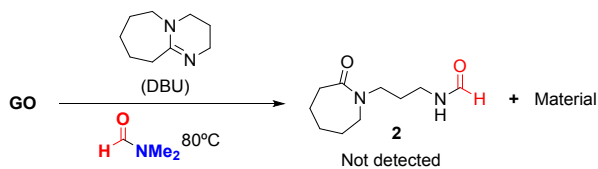

|                    | %C   | %H  | %N   | H/C   | N/C   |
|--------------------|------|-----|------|-------|-------|
| GO:                | 49.8 | 2.5 | 0.05 | 0.05  | 0.001 |
| Obtained Material: | 68.4 | 4.2 | 6.3  | 0.061 | 0.09  |

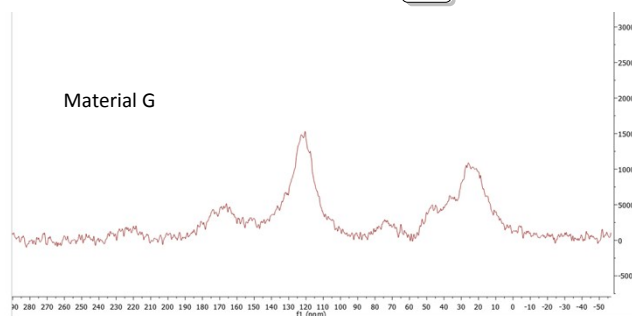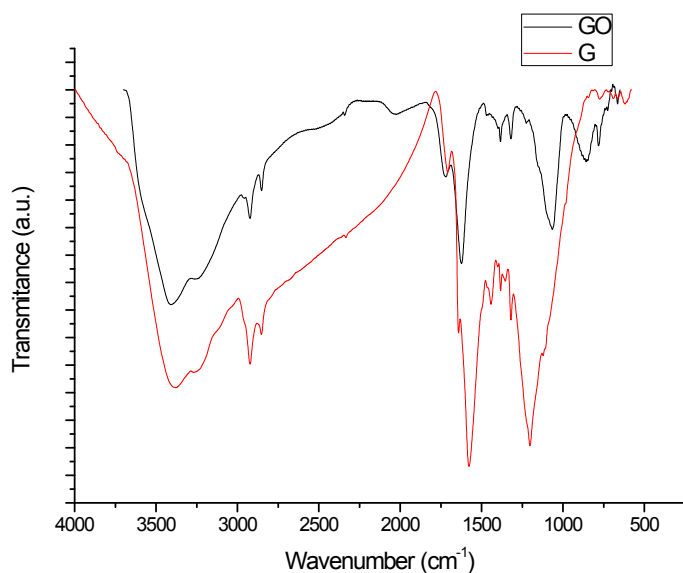



- **Data of Material E (GO + 1 + DMF)**

**Elemental analysis:** %C: 72.9; %H: 3.9; %N: 7.2 % S: 0.03

**<sup>13</sup>C NMR** (Top, in red) and its comparison with **<sup>13</sup>C NMR** of GO (Bottom, green)

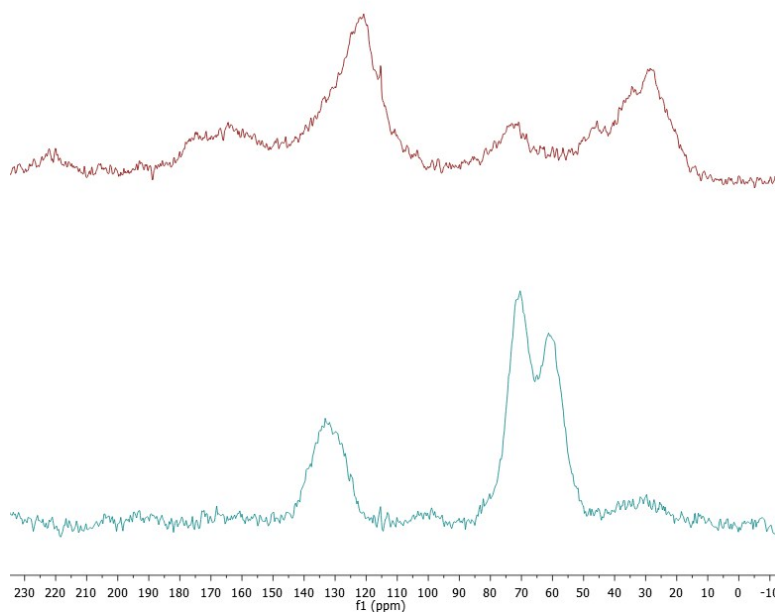

**TGA:**

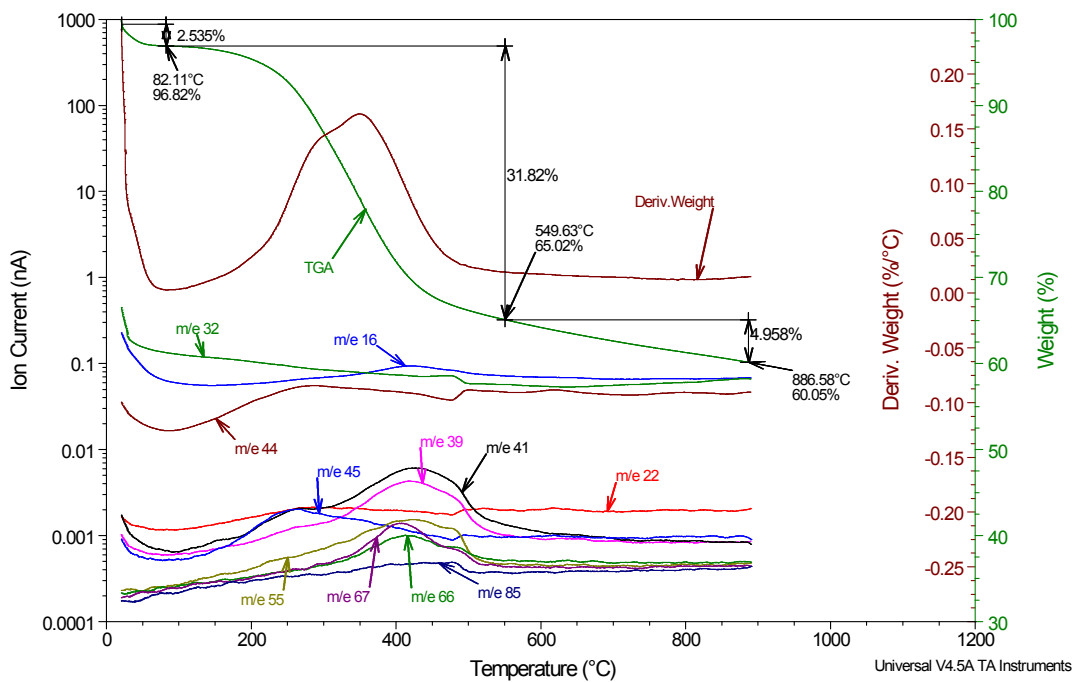

**FTIR:**

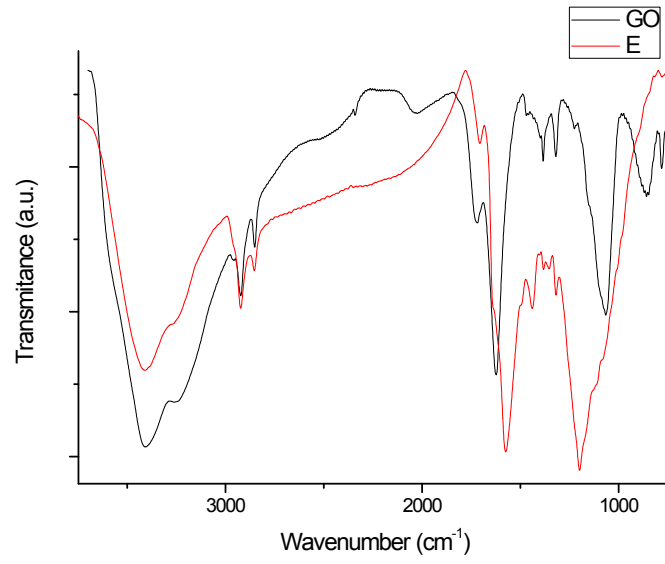

- **Data of Material F (GO + 1 in EtOH)**

**Elemental analysis:** %C: 65.0; %H: 2.1; %N: 5.1% S: 0.02%

<sup>13</sup>C NMR (Top, in red) and its comparison with <sup>13</sup>C NMR of GO (Bottom, green)

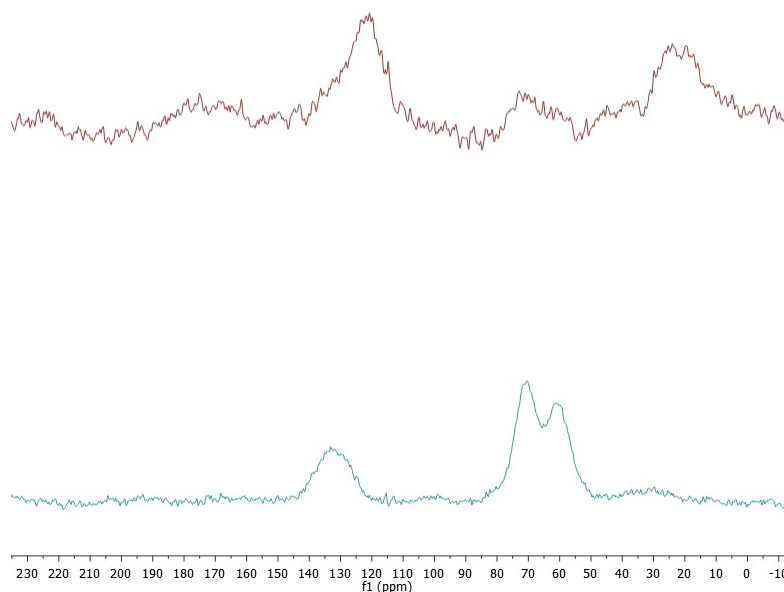

**TGA:**

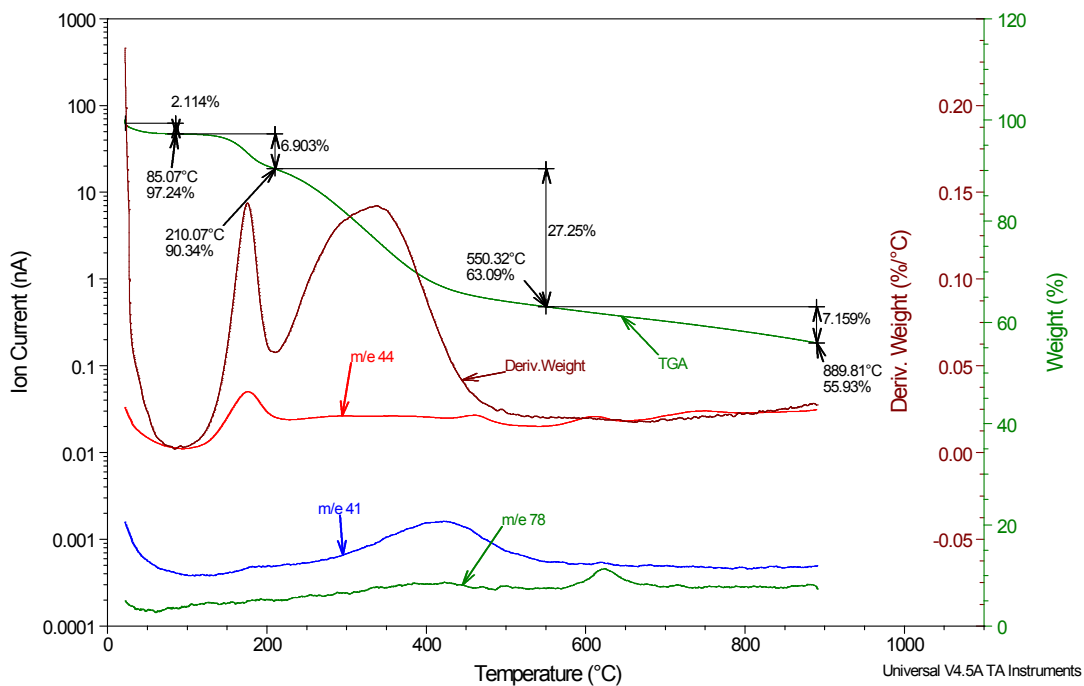

**FTIR:**

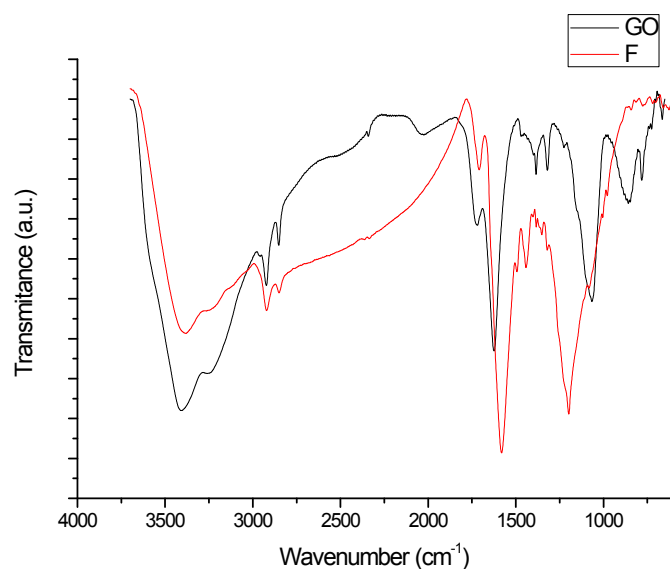

• **Data of Material A' (GO-NH (A) + DMF)**

Elemental analysis of Material **A**: %C: 66.5; %H: 2.8; %N: 5.2%

Elemental analysis of Material **A'**: %C: 66.1; %H: 2.1; %N: 5.1%

**FTIR (A'):**

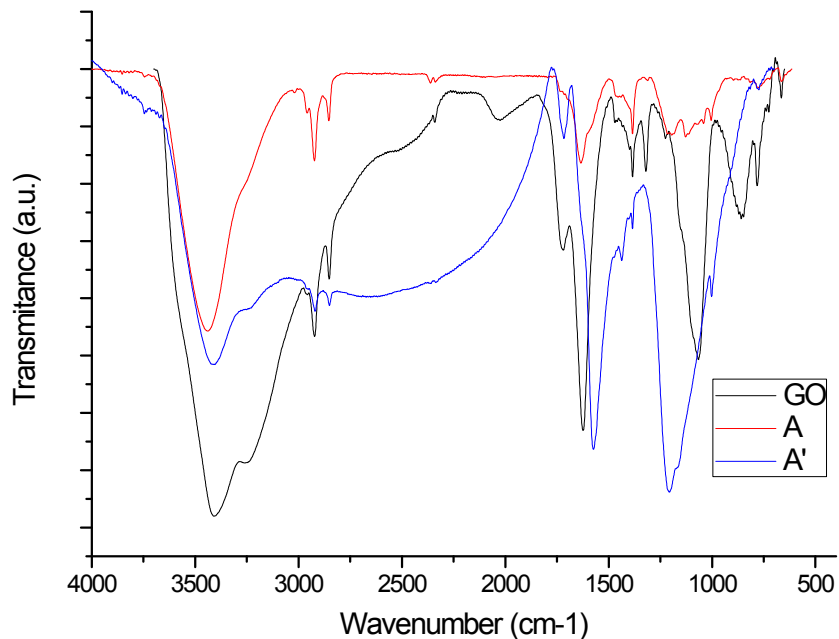

**TGA (A'):**

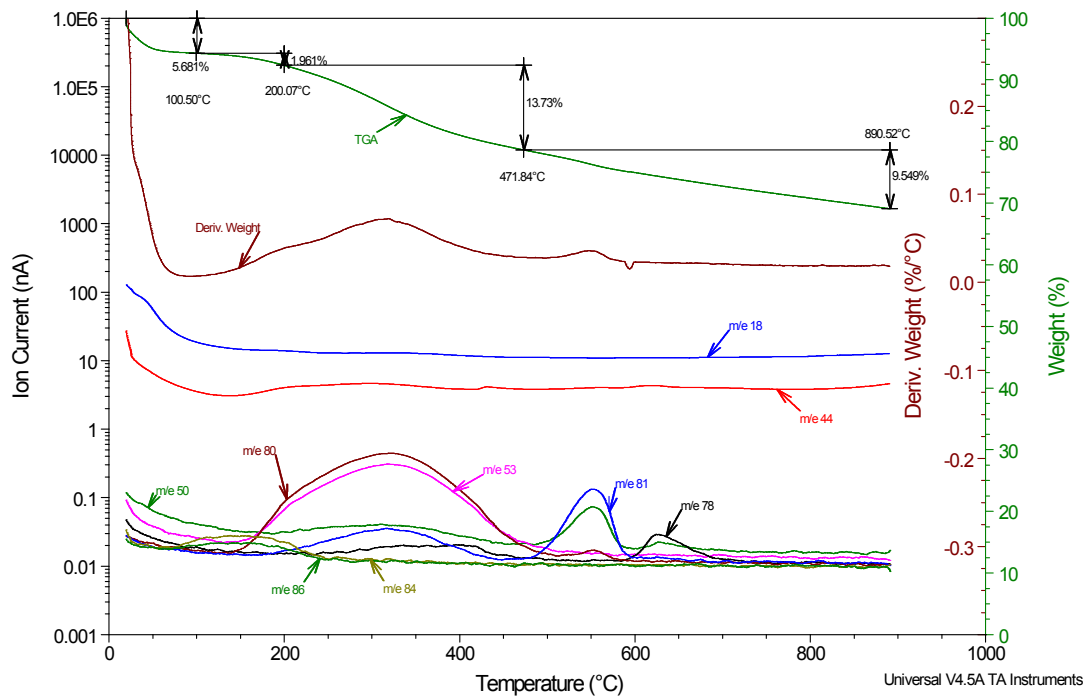

## TGA plots for materials A and A':

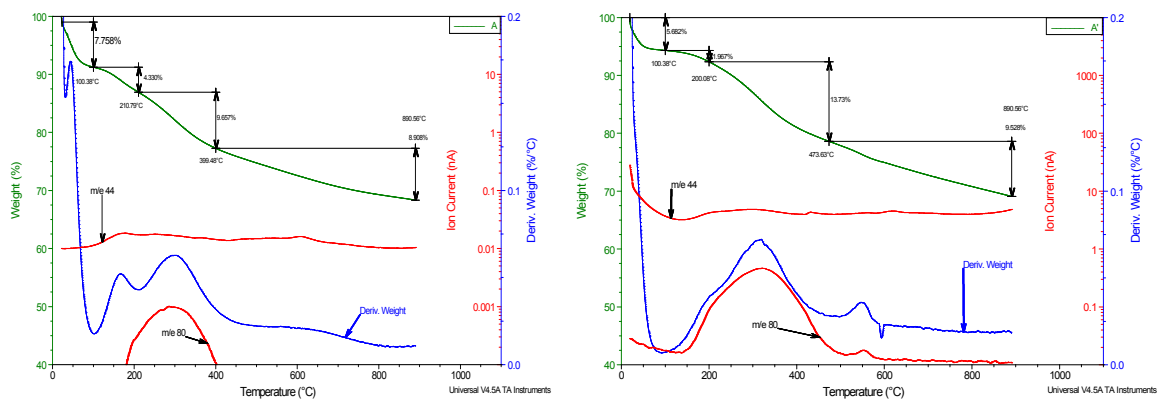

TGA plots for materials **A** and **A'** show differences between both materials probing that the reduction method influences the material that is obtained. If we focus on the weight loss between 200 and 475°C, that seems to be the temperature range where the  $\text{NMe}_2$  group is lost, it is slightly higher for material **A'** compared to material **A**. At this temperature range, piperazine is also removed from the material (m/e 80) and it seems logical to propose that the different profile and weight loss could be due to the  $\text{NMe}_2$  groups that have been incorporated during DMF treatment.

- Comparison of the data of materials B-F
  - Comparison of XPS of materials B and D

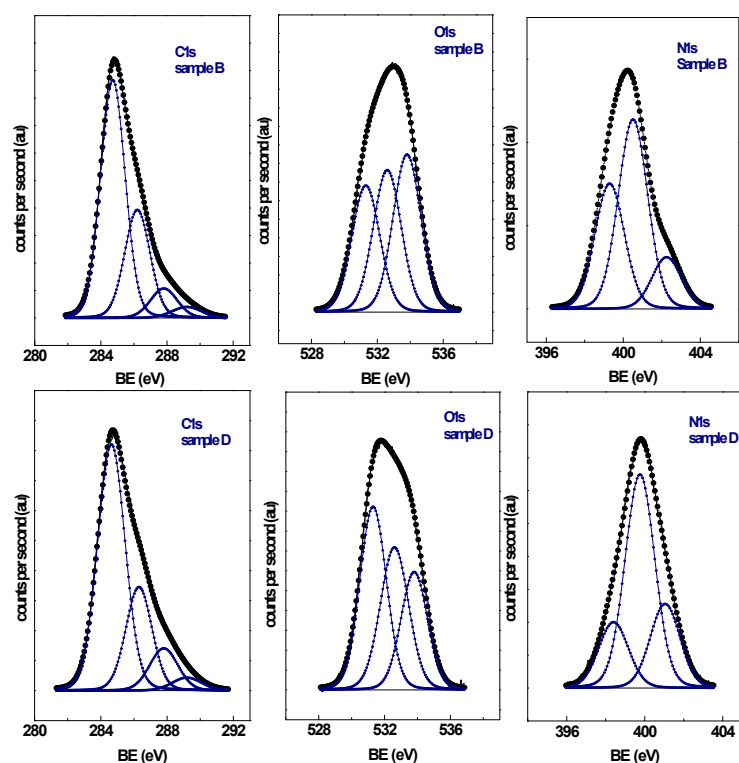

This figure shows deconvoluted XPS spectra for materials **B** and **D**. The deconvoluted C1s spectra of **B** and **D** show four components corresponding to C-C (284.6 eV), C-O/C-N (286.2 eV), C=O/N-C=O (287.8 eV) and O-C=O (289.2 eV) bonds. The O1s spectra of both samples display several component peaks representing C=O (531.3 eV), C-O (532.6 eV) and O=C-O (533.8 eV) bonds. The N1s peak can be split into three individual peaks located at 398.1 eV, 399.8 eV, and 401.8 eV.

**Table S1. Binding energies (eV) of core-levels and atomic percentages of Materials B and D. In parentheses peak percentages.**

|                   | C1s                                                          | O1s                                             | N1s                                    | C (%at)     | O (%at)     | N (%at)    |
|-------------------|--------------------------------------------------------------|-------------------------------------------------|----------------------------------------|-------------|-------------|------------|
| <b>Material B</b> | 284.8<br>(60)<br>286.2<br>(28)<br>287.8 (8)<br>289.2 (4)     | 531.3<br>(30)<br>532.6<br>(33)<br>533.8<br>(37) | 398.3 (34)<br>400.0 (52)<br>402.1 (14) | <b>85.4</b> | <b>11.8</b> | <b>2.8</b> |
| <b>Material D</b> | 284.8<br>(61)<br>286.2<br>(24)<br>287.8<br>(11)<br>289.2 (4) | 531.3<br>(40)<br>532.6<br>(34)<br>533.8<br>(26) | 398.1 (18)<br>399.8 (59)<br>401.8 (23) | <b>84.4</b> | <b>10.7</b> | <b>4.9</b> |





- Comparison of thermogravimetric analyses

### TGA of graphene oxide:

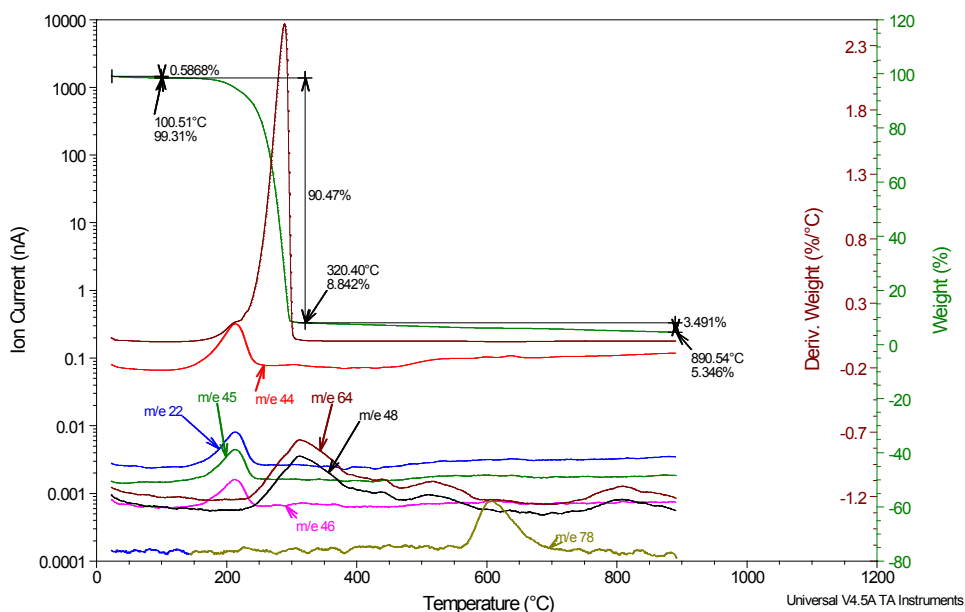

TGA plot for graphene oxide shows a main weight loss from 150 °C to 320 °C caused by the decomposition of labile oxygen groups. This weight loss is also present in material **F** but not in materials **B**, **D** and **E**. This could be due to the lower temperature at which material **F** was prepared, and it is in agreement with the presence of oxygenated groups in material **F** observed by NMR.

### TGA of materials B, D, E and F:

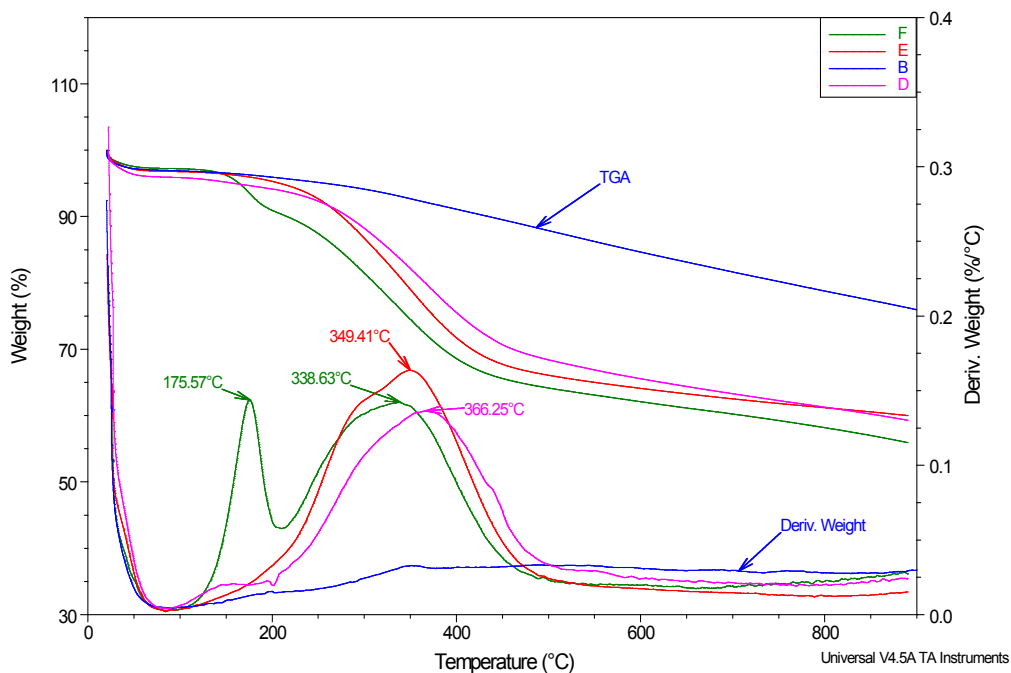

Material **B** (GO+DMF); Material **D** (GO + DBU + DMF); Material **E** (GO + **1** in DMF); Material **F** (GO + **1** in EtOH / H<sub>2</sub>O).

We can observe that the mass loss in sample **B**, presumably due to  $\text{NMe}_2$  groups, is quite constant. According to the mass loss in **D**, **E** and **F** (200-550 °C) their degree of functionalization should be quite similar. The maximum of the derivative displaced towards higher temperatures in the order **F**, **E** and **D** indicates that the chains anchored to the graphene are more thermally stable in **E** and **D** than in **F**. One possible explanation could be the higher degree of aromaticity in materials **E** and **D** than in **F** and the gradual loss of  $\text{NMe}_2$  groups. The high decomposition temperature of **D** is consistent with a higher number of  $\text{NMe}_2$  groups anchored than in **E**.

**Table S2. Weight loss of materials B, D-F**

| Materials | % Weight loss (20-200 °C) | % Weight loss (200-550 °C) | % Weight loss at 900 °C |
|-----------|---------------------------|----------------------------|-------------------------|
| <b>B</b>  | 4                         | 9.7                        | 27                      |
| <b>D</b>  | 5.6                       | 27.3                       | 41                      |
| <b>E</b>  | 4.5                       | 30.3                       | 40                      |
| <b>F</b>  | 8.4                       | 27.8                       | 44                      |

Further information regarding the functionalization was obtained using a TGA coupled to a mass spectrometer detector. The following figures show the  $m/e = 44$  and  $32$ , respectively, detected upon heating each of GO, **B**, **D**, **E** and **F** materials.

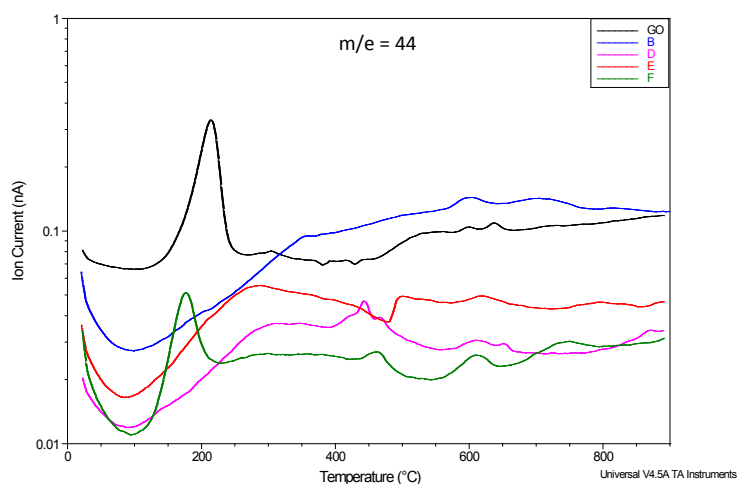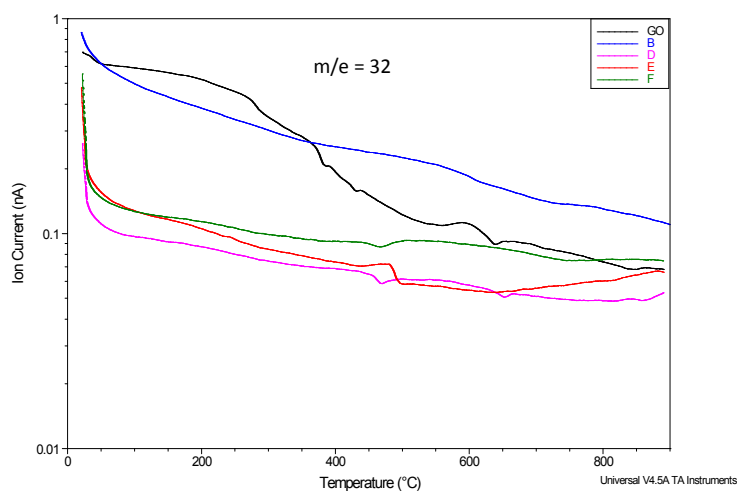

The  $m/e = 44$  fragment may correspond to either  $\text{NMe}_2$  groups or  $\text{CO}_2$ , the latter being formed after combustion of the sample. In order to differentiate both possibilities, we also checked the  $m/e = 32$  to monitor the traces of  $\text{O}_2$  present in the chamber. The simultaneous drop of the  $m/e = 32$  ion current and increase of  $m/e = 44$  ion current indicates a combustion reaction generating  $\text{CO}_2$ .

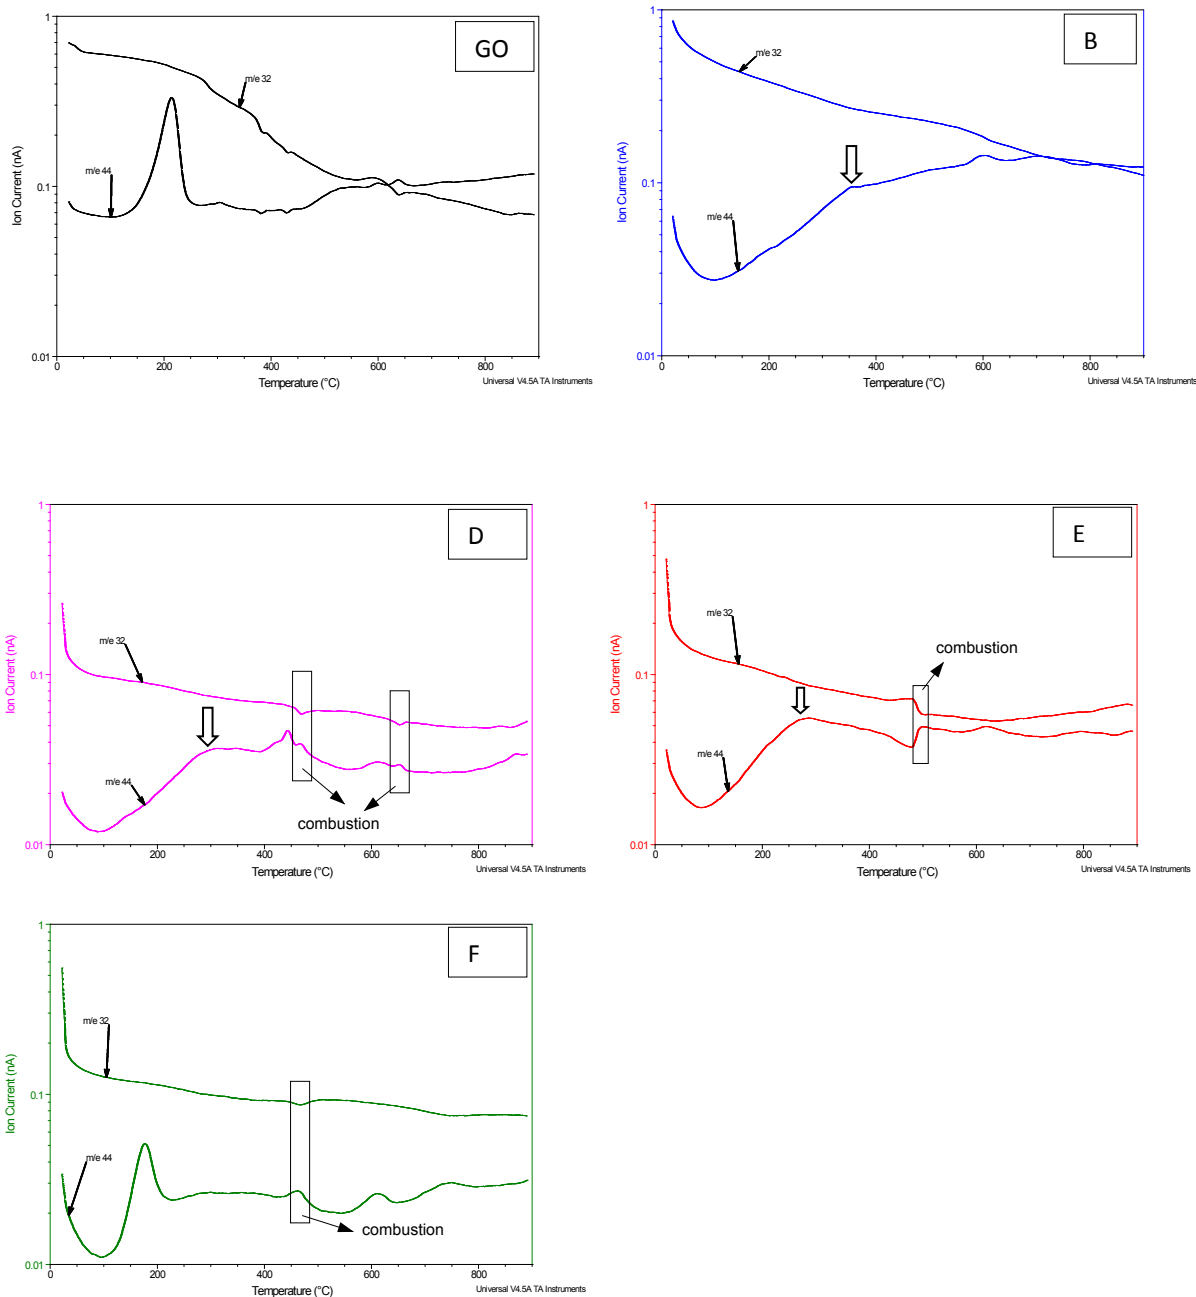

Both graphene oxide and material **F** show their main weight loss around 200 °C, which may be attributed to the removal of oxygenated groups. In materials **B**, **D** and **E** this possibility is excluded probably due to the higher temperatures employed in their preparation compared to **F**, leading to materials with less oxygenated groups. In contrast for materials **B**, **D** and **E** but not for material **F** there is a weight loss around 300 °C that corresponds to a wide peak in  $m/e=44$  curves. We assigned this loss to the  $\text{NMe}_2$  groups as there is no drop in the  $m/e=32$  curve and therefore no combustion reaction.

## 5. Mechanistic Studies

### Hydrolysis and acylation of DBU catalyzed by GO

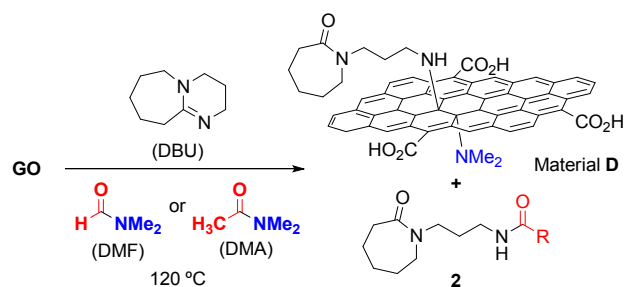

A suspension of GO (100 mg) in DMF or DMA (5 mL) was sonicated for 30 minutes. Then DBU (0.15 mL, 153 mg, 1 mmol) was added and the reaction mixture was stirred at 120 °C during the corresponding time (2 or 4 days, see Table 2). After that time, the material was filtered through a filter plate and the solvent was removed under reduced pressure. The crude was purified by FCC (hexane/acetone, 1:4), affording **2a-b** as yellow oils.

Data of *N*-((*N*'-formyl)-3-aminopropyl)azepan-2-one (**2a**, R = H):

**<sup>1</sup>H RMN** (300 MHz, CDCl<sub>3</sub>) δ 8.13 (s, 1H), 3.45 (t, *J* = 5.9 Hz, 2H), 3.34 (t, *J* = 5.4 Hz, 2H), 3.24 (q, *J* = 5.9 Hz, 2H), 2.53 (t, *J* = 5.9 Hz, 2H), 1.69 (m, 8H). **<sup>13</sup>C NMR** (75 MHz, CDCl<sub>3</sub>) δ 177.0 (C=O), 161.3 (C=O), 49.6 (CH<sub>2</sub>), 44.9 (CH<sub>2</sub>), 37.1 (CH<sub>2</sub>), 33.8 (CH<sub>2</sub>), 29.8 (CH<sub>2</sub>), 28.4 (CH<sub>2</sub>), 27.5 (CH<sub>2</sub>), 23.4 (CH<sub>2</sub>). **MS** (EI): *m/z* 199 (M<sup>+</sup>, 5), 170 (10), 140 (64), 126 (32), 98 (100), 85 (15). **HRMS** (EI): calculated for C<sub>10</sub>H<sub>18</sub>N<sub>2</sub>O<sub>2</sub> (M<sup>+</sup>): 198.1368; found: 198.1364.

Data of *N*-((*N*'-acetyl)-3-aminopropyl)azepan-2-one (**2b**, R = Me):<sup>3</sup>

**<sup>1</sup>H RMN** (300 MHz, CDCl<sub>3</sub>) δ 3.44 (t, *J* = 6.1 Hz, 2H), 3.33 (t, *J* = 5.1 Hz, 2H), 3.19 (q, *J* = 5.9 Hz, 2H), 2.54 (t, *J* = 6.1 Hz, 2H), 1.98 (s, 3H), 1.69 (m, 8H).

### Transamidation of 4-phenylbutylamine

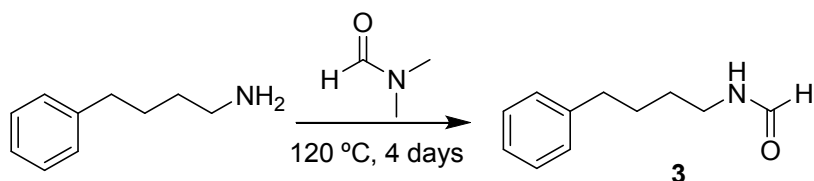

A suspension of GO (100 mg) in DMF (5 mL) was sonicated for 30 minutes. Then, 4-phenylbutylamine (0.158 mL, 149 mg, 1 mmol) and DBU (0.15 mL, 153 mg, 1 mmol) were added and the reaction mixture was stirred at 120 °C during 48 h. After that time, the material was filtered through a filter plate and the solvent was removed under reduced pressure. The crude was purified by FCC (hexane/EtOAc, 1:2 to 1:4), affording **3** as a colorless oil.

Data of *N*-(4-phenylbutyl)formamide (**3**):<sup>4</sup>

<sup>3</sup> A. Guggisberg, U. Kramer, C. Heidelberger, R. Charubala, E. Stephanou, M. Hesse and H. Schmid, *Helv. Chim. Acta*, 1978, **61**, 1050.

<sup>4</sup> A. K. Sharma, A. Sharma, D. Desai, S. V. Madhunapantula, S. J. Huh, G. P. Robertson and S. Amin, *J. Med.*

$^1\text{H NMR}$  (300 MHz,  $\text{CDCl}_3$ )  $\delta$  8.13 (s, 1H), 7.24 (m, 5H), 3.25 (m, 2H), 2.64 (t,  $J = 7.1$  Hz, 2H), 1.62 (m, 4H).

## 6. pH measurements

For the determination of pH, 40 mg of the corresponding material were stirred in 4 mL of deionized water during 16 h at room temperature. Then, the measurements were performed under soft stirring of the suspension.

## 7. Comparison between theory and experiment:

Experimental Infrared Spectrum of GO compared to two GO-models Infrared spectra achieved with ONIMO model.

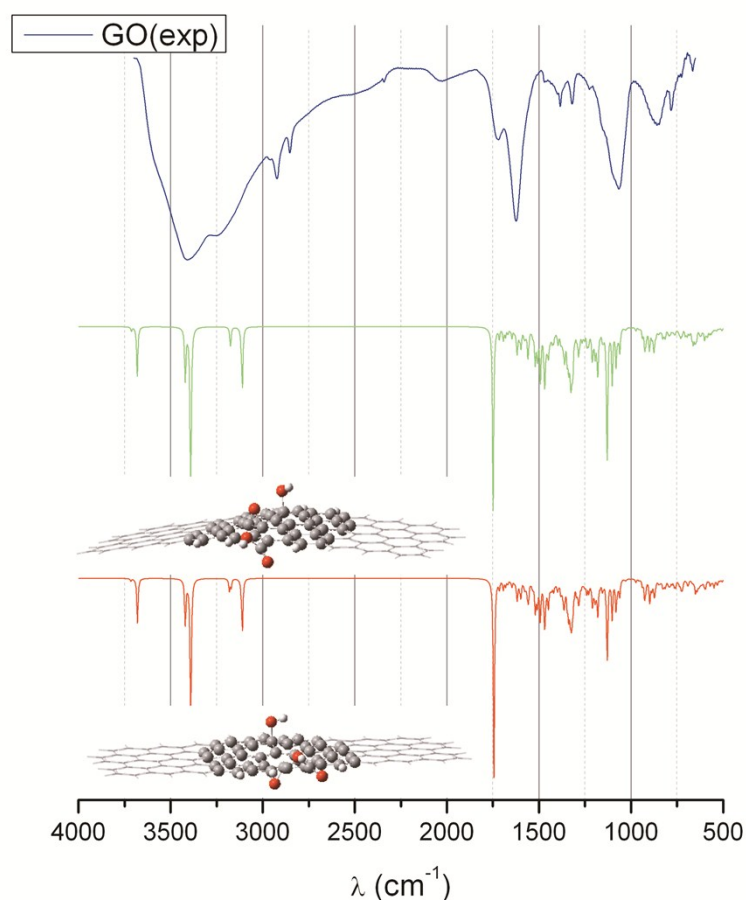

Comparison between FTIR of Material B,D and E and the IR of a product of HNMe<sub>2</sub> insertion in the GO-model achieved with ONIOM model.

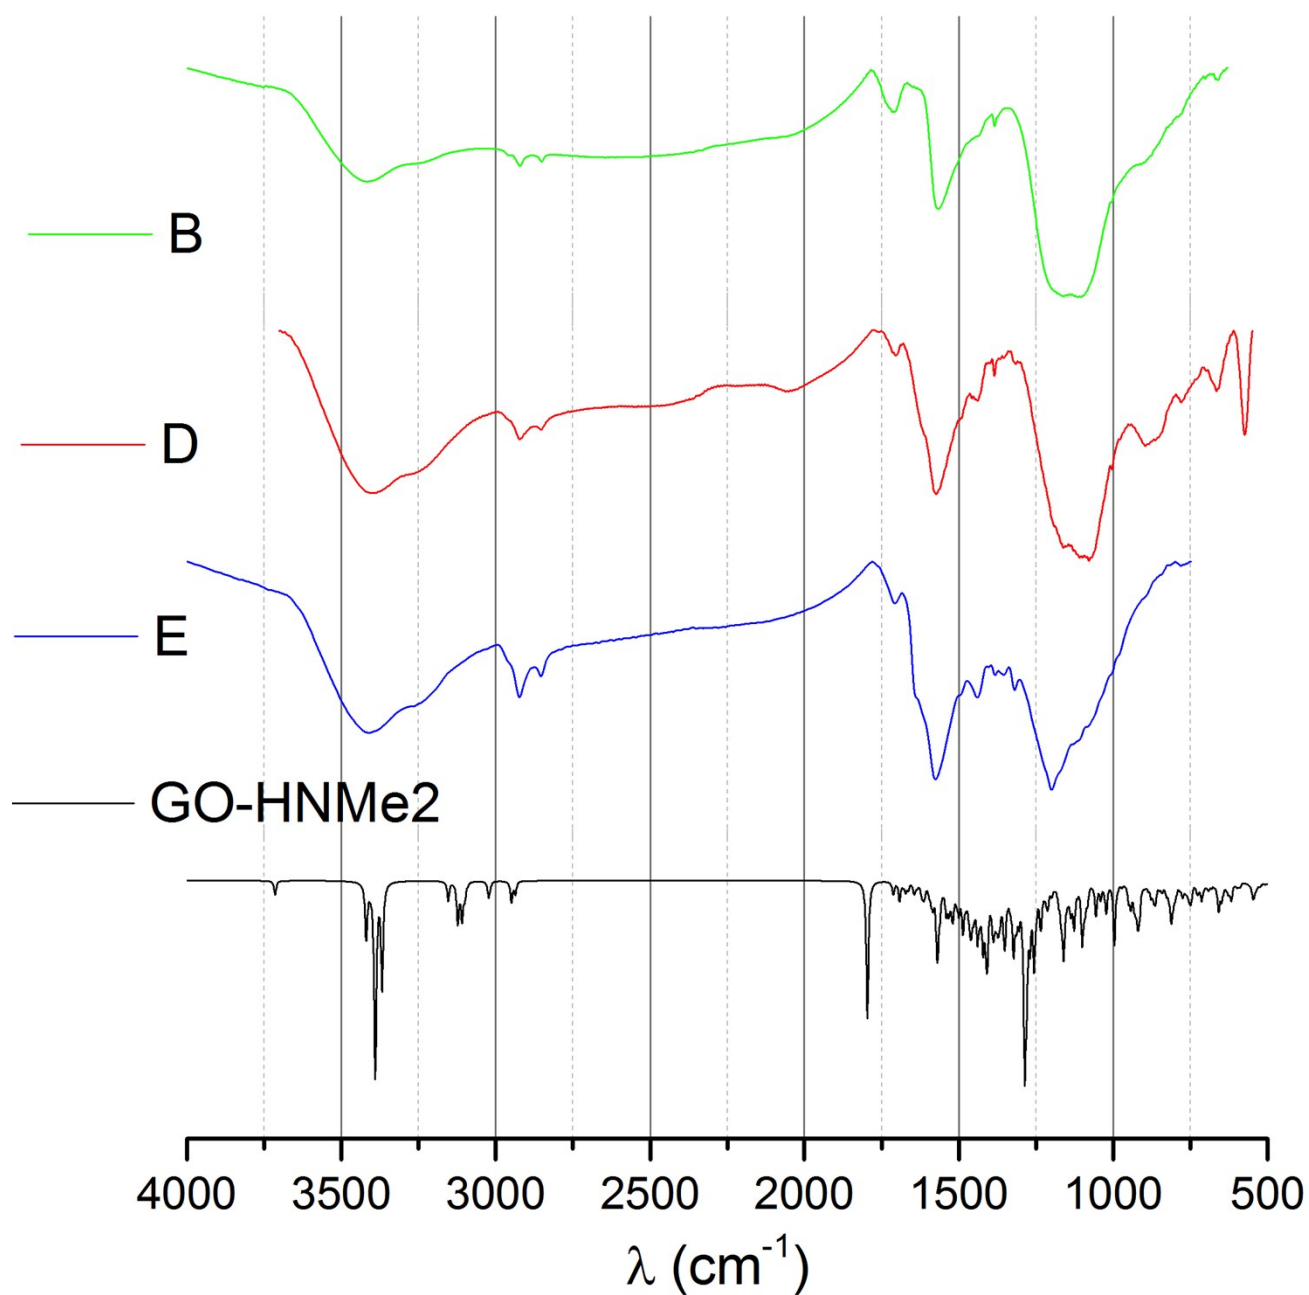

### **8. Cartesian Coordinates of the optimized complexes:**

#### **DMF:**

| Tag | X          | Y          | Z          |
|-----|------------|------------|------------|
| C   | -0.8272550 | -0.6855000 | -0.0002550 |
| O   | -1.9213880 | -0.1576710 | -0.0001350 |
| N   | 0.3552680  | -0.0140620 | -0.0001260 |
| H   | -0.6899990 | -1.7844910 | -0.0002840 |
| C   | 0.3173720  | 1.4449640  | 0.0001580  |
| H   | -0.2086190 | 1.8184080  | 0.8827730  |
| H   | 1.3376980  | 1.8283560  | 0.0004760  |
| H   | -0.2081970 | 1.8187500  | -0.8825630 |
| C   | 1.6340810  | -0.7003440 | 0.0002170  |
| H   | 2.2236620  | -0.4483490 | -0.8882030 |
| H   | 2.2227180  | -0.4494350 | 0.8895870  |

|   |           |            |            |
|---|-----------|------------|------------|
| H | 1.4617730 | -1.7781600 | -0.0005460 |
|---|-----------|------------|------------|

**DBU**

| Tag | X          | Y          | Z          |
|-----|------------|------------|------------|
| C   | -2.6015760 | 0.7656690  | 0.1964770  |
| C   | -2.3804700 | -0.6440990 | 0.7514240  |
| C   | -1.4450200 | -1.4131460 | -0.1780420 |
| H   | -1.9814420 | -1.7135000 | -1.0897110 |
| H   | -3.1931790 | 1.3619640  | 0.8975180  |
| H   | -3.1905020 | 0.7108170  | -0.7308680 |
| H   | -3.3253500 | -1.1846700 | 0.8596950  |
| H   | -1.9276490 | -0.5705860 | 1.7458420  |
| H   | -1.0988420 | -2.3318690 | 0.3069570  |
| C   | -0.3276000 | 0.7829830  | -0.3959420 |
| C   | 0.9529300  | -1.2809870 | -0.9018700 |
| C   | 0.9669690  | 1.5189290  | -0.6859830 |
| C   | 2.0066600  | -1.3462470 | 0.2273260  |
| H   | 1.3843870  | -0.7932840 | -1.7793800 |
| H   | 0.6868130  | -2.2905650 | -1.2245600 |
| C   | 2.1234010  | 1.2522200  | 0.3214170  |
| H   | 0.7092990  | 2.5766370  | -0.6856030 |
| H   | 1.2939370  | 1.2738010  | -1.7014970 |
| C   | 2.0467370  | -0.0768610 | 1.0904500  |
| H   | 2.9864170  | -1.5324650 | -0.2284100 |
| H   | 1.8004070  | -2.2029770 | 0.8782070  |
| H   | 3.0797270  | 1.3190630  | -0.2092100 |
| H   | 2.1282850  | 2.0584390  | 1.0606020  |
| H   | 2.8997190  | -0.1398970 | 1.7740450  |
| H   | 1.1547920  | -0.0570590 | 1.7245360  |
| N   | -0.2803230 | -0.5971830 | -0.5253280 |
| N   | -1.3566780 | 1.4779530  | -0.0674880 |

**minA-1**

| Tag | Symbol X   | Y          | Z          |
|-----|------------|------------|------------|
| C   | 1.9342340  | 1.6418440  | 0.1750550  |
| C   | 0.7484990  | 2.4112370  | 0.7593060  |
| C   | -0.4592700 | 2.2470920  | -0.1584700 |
| H   | -0.3375910 | 2.8628320  | -1.0603520 |
| H   | 2.7876210  | 1.6745840  | 0.8575530  |
| H   | 2.2644640  | 2.1211370  | -0.7578940 |
| H   | 0.9822250  | 3.4725510  | 0.8803840  |
| H   | 0.5146780  | 2.0093470  | 1.7503320  |
| H   | -1.3688800 | 2.5900480  | 0.3445700  |
| C   | 0.4015360  | -0.0579400 | -0.4110160 |
| C   | -1.9792370 | 0.3968140  | -0.9033670 |
| C   | 0.0732380  | -1.5117360 | -0.6942160 |
| C   | -2.7354750 | -0.3189070 | 0.2369480  |
| H   | -1.9136320 | -0.2598640 | -1.7733110 |
| H   | -2.5377330 | 1.2758180  | -1.2338390 |
| C   | -0.9159000 | -2.1750260 | 0.3092440  |
| H   | 1.0204740  | -2.0476700 | -0.6746220 |
| H   | -0.3188670 | -1.5865730 | -1.7134400 |
| C   | -1.8279950 | -1.2171940 | 1.0910440  |
| H   | -3.5464420 | -0.9064270 | -0.2089400 |

|   |            |            |            |
|---|------------|------------|------------|
| H | -3.2126880 | 0.4199520  | 0.8899770  |
| H | -1.5245600 | -2.9096300 | -0.2290660 |
| H | -0.3281390 | -2.7408660 | 1.0369710  |
| H | -2.4508810 | -1.8011260 | 1.7761320  |
| H | -1.2012920 | -0.5822200 | 1.7255080  |
| N | -0.6358730 | 0.8411920  | -0.5354540 |
| N | 1.6143170  | 0.2421940  | -0.0862340 |
| O | 3.2982050  | -2.0535040 | 0.1159890  |
| H | 3.6988150  | -2.0373100 | -0.7585210 |
| H | 2.7998900  | -1.2073580 | 0.1452910  |

### TSA-12

| Tag | X          | Y          | Z          |
|-----|------------|------------|------------|
| C   | -2.5051750 | 0.0419940  | -0.7915830 |
| C   | -2.0596940 | 1.4961100  | -0.7361130 |
| C   | -1.1315890 | 1.6886980  | 0.4562770  |
| H   | -1.6818710 | 1.5660410  | 1.3972960  |
| H   | -3.0853680 | -0.1514620 | -1.6974010 |
| H   | -3.1281480 | -0.1965770 | 0.0763190  |
| H   | -2.9251220 | 2.1569110  | -0.6419740 |
| H   | -1.5335870 | 1.7673800  | -1.6573800 |
| H   | -0.6854200 | 2.6855800  | 0.4472520  |
| C   | -0.2699740 | -0.5368500 | -0.0391690 |
| C   | 1.1447610  | 0.9677970  | 1.2415440  |
| C   | 0.8760300  | -1.5141430 | -0.0197030 |
| C   | 2.4994930  | 0.9327660  | 0.4727120  |
| H   | 1.1432530  | 0.2581910  | 2.0738900  |
| H   | 1.0000920  | 1.9555360  | 1.6791920  |
| C   | 2.0054590  | -1.1319980 | -1.0033350 |
| H   | 0.4708750  | -2.4963520 | -0.2477370 |
| H   | 1.2620760  | -1.5748800 | 0.9972540  |
| C   | 2.4208680  | 0.3488340  | -0.9451600 |
| H   | 3.2220380  | 0.3649710  | 1.0680480  |
| H   | 2.8937920  | 1.9506660  | 0.4029210  |
| H   | 2.8677170  | -1.7680620 | -0.7765620 |
| H   | 1.6975260  | -1.3752380 | -2.0246130 |
| H   | 3.3942330  | 0.4712100  | -1.4301630 |
| H   | 1.7151390  | 0.9468310  | -1.5291720 |
| N   | -0.0394710 | 0.7064560  | 0.4104890  |
| N   | -1.3501510 | -0.8670800 | -0.7848890 |
| O   | -1.4744940 | -1.8670390 | 1.3567460  |
| H   | -1.6294430 | -1.7563500 | -0.2543040 |
| H   | -1.3555560 | -2.5029640 | 2.0711510  |

### MinA-2

| Tag | X         | Y          | Z          |
|-----|-----------|------------|------------|
| C   | 2.5532930 | 0.5363650  | -0.5605590 |
| C   | 2.3148260 | -0.9209600 | -0.9442030 |
| C   | 1.3127370 | -1.5559450 | 0.0197040  |
| H   | 1.7678100 | -1.6657370 | 1.0168460  |
| H   | 3.1636670 | 1.0400180  | -1.3150910 |
| H   | 3.0945300 | 0.5789160  | 0.3966380  |
| H   | 3.2571580 | -1.4771110 | -0.9236500 |
| H   | 1.9119140 | -0.9638480 | -1.9603750 |
| H   | 1.0447510 | -2.5559410 | -0.3309830 |



|   |            |            |            |
|---|------------|------------|------------|
| C | 0.3102240  | 0.6227150  | 0.4384990  |
| C | -1.0361630 | -1.4137850 | 0.7481310  |
| C | -0.9895430 | 1.4406510  | 0.4234000  |
| C | -2.4352690 | -1.0242720 | 0.1770250  |
| H | -1.0012790 | -1.2448960 | 1.8332900  |
| H | -0.8889730 | -2.4852860 | 0.5993350  |
| C | -1.8705650 | 1.2853090  | -0.8236450 |
| H | -0.7149310 | 2.4964770  | 0.5437330  |
| H | -1.5559240 | 1.1762600  | 1.3195960  |
| C | -2.3607930 | -0.1594760 | -1.0881250 |
| H | -3.0229120 | -0.5083530 | 0.9438420  |
| H | -2.9868710 | -1.9412560 | -0.0519370 |
| H | -2.7367500 | 1.9430800  | -0.6886940 |
| H | -1.3279200 | 1.6547350  | -1.6971860 |
| H | -3.3502970 | -0.1211730 | -1.5554000 |
| H | -1.6911590 | -0.6448190 | -1.7997590 |
| N | 0.0829640  | -0.7565210 | 0.0662620  |
| N | 1.2547040  | 1.2158730  | -0.4938370 |
| O | 0.8298170  | 0.6147270  | 1.8084250  |
| H | 1.3757750  | 2.1969720  | -0.2666600 |
| H | 0.8667140  | 1.5250610  | 2.1207310  |

#### TsA-21

| Tag | X          | Y          | Z          |
|-----|------------|------------|------------|
| C   | -2.6551630 | -0.3612140 | -0.5524890 |
| C   | -2.2026660 | 1.0297410  | -0.9789350 |
| C   | -1.2231090 | 1.5958580  | 0.0470800  |
| H   | -1.7047410 | 1.6699310  | 1.0348570  |
| H   | -3.2587310 | -0.8535830 | -1.3180950 |
| H   | -3.2657670 | -0.2786830 | 0.3494710  |
| H   | -3.0819470 | 1.6753480  | -1.0668310 |
| H   | -1.7116830 | 0.9946490  | -1.9569190 |
| H   | -0.9205060 | 2.6014510  | -0.2539330 |
| C   | -0.2725410 | -0.5950280 | 0.5656770  |
| C   | 1.1128210  | 1.4042420  | 0.7603450  |
| C   | 0.9477000  | -1.5010910 | 0.3123880  |
| C   | 2.5016370  | 0.8874400  | 0.2944710  |
| H   | 1.0193510  | 1.3255760  | 1.8529440  |
| H   | 1.0418180  | 2.4657910  | 0.5119910  |
| C   | 1.7761820  | -1.2562490 | -0.9555690 |
| H   | 0.5900610  | -2.5365360 | 0.3398920  |
| H   | 1.5658730  | -1.4017600 | 1.2072950  |
| C   | 2.4506530  | 0.1405590  | -1.0445070 |
| H   | 2.9469760  | 0.2462900  | 1.0604930  |
| H   | 3.1733680  | 1.7466280  | 0.2021010  |
| H   | 2.5487980  | -2.0322670 | -0.9925040 |
| H   | 1.1548570  | -1.4148960 | -1.8449640 |
| H   | 3.4703440  | 0.0230980  | -1.4250830 |
| H   | 1.9169490  | 0.7608820  | -1.7676640 |
| N   | -0.0228290 | 0.7593930  | 0.0815730  |
| N   | -1.5074700 | -1.2480790 | -0.2147260 |
| O   | -0.8177490 | -0.7759740 | 1.7920470  |
| H   | -1.5864150 | -1.5505180 | 0.9459440  |
| H   | -1.2575960 | -1.8783470 | -0.9740560 |

**Structure 1**

| Tag | X          | Y          | Z          |
|-----|------------|------------|------------|
| C   | 2.1961160  | 1.0264690  | -0.0648040 |
| C   | 1.3458240  | 2.0253770  | 0.7015390  |
| C   | 0.0188030  | 2.2104160  | -0.0139430 |
| H   | 0.1283620  | 2.8288510  | -0.9098380 |
| H   | 3.1260660  | 0.7864880  | 0.4438990  |
| H   | 2.4422000  | 1.3874200  | -1.0671610 |
| H   | 1.8608820  | 2.9849470  | 0.7668680  |
| H   | 1.1872570  | 1.6688500  | 1.7226840  |
| H   | -0.7163230 | 2.6904020  | 0.6339660  |
| C   | 0.1111640  | -0.2246610 | -0.4687890 |
| C   | -2.0098880 | 0.9412620  | -0.7796740 |
| C   | -0.6435220 | -1.4784790 | -0.8417690 |
| C   | -2.9054140 | 0.3374540  | 0.3245710  |
| H   | -2.1497690 | 0.4278750  | -1.7304060 |
| H   | -2.2621950 | 1.9859460  | -0.9557880 |
| C   | -1.6649410 | -1.9493520 | 0.2342220  |
| H   | 0.0403960  | -2.2831280 | -1.0952600 |
| H   | -1.1644920 | -1.2524750 | -1.7746120 |
| C   | -2.2684360 | -0.8294690 | 1.0946600  |
| H   | -3.8357480 | 0.0188170  | -0.1540870 |
| H   | -3.1794070 | 1.1165830  | 1.0402590  |
| H   | -2.4530000 | -2.5013000 | -0.2835750 |
| H   | -1.1726870 | -2.6646080 | 0.8979540  |
| H   | -3.0231460 | -1.2655970 | 1.7527440  |
| H   | -1.4950220 | -0.4362600 | 1.7637720  |
| N   | -0.5620940 | 0.9120670  | -0.4408610 |
| N   | 1.4420870  | -0.2438470 | -0.2015090 |
| C   | 2.1770480  | -1.4488640 | 0.0394170  |
| O   | 3.3498790  | -1.4342900 | 0.2576820  |
| H   | 1.5671240  | -2.3569500 | 0.0311310  |

**MinA-3**

| Tag | X          | Y          | Z          |
|-----|------------|------------|------------|
| C   | 0.1481800  | 2.5951680  | 0.4071020  |
| C   | -1.2617000 | 2.6277980  | -0.1937120 |
| C   | -1.5322310 | 1.6255730  | -1.3348120 |
| H   | -0.6429220 | 1.5078880  | -1.9545370 |
| H   | 0.2115050  | 3.3927700  | 1.1541230  |
| H   | 0.8678150  | 2.8573170  | -0.3881780 |
| H   | -1.4254380 | 3.6329070  | -0.6004270 |
| H   | -1.9995970 | 2.4883830  | 0.6030040  |
| H   | -2.3297320 | 2.0181150  | -1.9744160 |
| C   | -1.0802240 | -0.7690040 | -0.9931530 |
| C   | -3.3212310 | 0.0959840  | -0.4283240 |
| C   | -1.6404140 | -2.1346190 | -0.6120910 |
| C   | -3.4351630 | -0.1944650 | 1.0865100  |
| H   | -3.7961990 | -0.7083990 | -0.9966370 |
| H   | -3.8743060 | 1.0042940  | -0.6723500 |
| C   | -1.9282920 | -2.3051590 | 0.9067680  |
| H   | -0.9044440 | -2.8676230 | -0.9408470 |
| H   | -2.5521660 | -2.3188910 | -1.1874470 |
| C   | -2.2668000 | -1.0090370 | 1.6601040  |
| H   | -4.3875600 | -0.7107500 | 1.2556710  |

|   |            |            |            |
|---|------------|------------|------------|
| H | -3.4905480 | 0.7501120  | 1.6359960  |
| H | -2.7348010 | -3.0365990 | 1.0270640  |
| H | -1.0444460 | -2.7431450 | 1.3793090  |
| H | -2.4943290 | -1.2596220 | 2.7012580  |
| H | -1.3818750 | -0.3653020 | 1.6894090  |
| N | -1.9490460 | 0.2801000  | -0.9182100 |
| N | 0.4598750  | 1.3285340  | 1.0723250  |
| O | 0.0957840  | -0.6328840 | -1.3387400 |
| H | 0.6229200  | 0.6120360  | 0.3692420  |
| H | 1.3332120  | 1.4137940  | 1.5857380  |
| C | 3.5525300  | -0.3806380 | 1.1192200  |
| O | 3.6110940  | 0.7096200  | 1.6643760  |
| H | 3.5789570  | -1.3266230 | 1.6920970  |
| N | 3.4492110  | -0.5996770 | -0.2149150 |
| C | 3.3862890  | 0.5182240  | -1.1453840 |
| H | 4.1813970  | 0.4316650  | -1.8936540 |
| H | 2.4174110  | 0.5292490  | -1.6518460 |
| H | 3.5211510  | 1.4377900  | -0.5794800 |
| C | 3.2627830  | -1.9329180 | -0.7617840 |
| H | 3.3212820  | -2.6678840 | 0.0432200  |
| H | 2.2827710  | -2.0069940 | -1.2418750 |
| H | 4.0422770  | -2.1625300 | -1.4965800 |

### TsA-32

| Tag | X          | Y          | Z          |
|-----|------------|------------|------------|
| C   | -1.2101980 | -2.3093880 | -0.0161520 |
| C   | 0.2060060  | -2.3861780 | 0.5799130  |
| C   | 1.3642050  | -2.1619730 | -0.4284450 |
| H   | 1.0047950  | -2.3213960 | -1.4468810 |
| H   | -1.9277870 | -2.6756310 | 0.7252390  |
| H   | -1.2798020 | -2.9823550 | -0.8786020 |
| H   | 0.3165970  | -3.3886730 | 1.0086770  |
| H   | 0.2968590  | -1.6796550 | 1.4090330  |
| H   | 2.1473710  | -2.9002350 | -0.2402220 |
| C   | 1.5916980  | 0.1300350  | -1.2560480 |
| C   | 3.1638960  | -0.6305080 | 0.4897710  |
| C   | 2.4060020  | 1.4167260  | -1.2818290 |
| C   | 2.8990830  | 0.3340280  | 1.6629990  |
| H   | 4.0039060  | -0.2612390 | -0.1059830 |
| H   | 3.4687290  | -1.6061050 | 0.8717810  |
| C   | 2.3598570  | 2.2763910  | 0.0157080  |
| H   | 2.0198050  | 1.9877960  | -2.1251170 |
| H   | 3.4424610  | 1.1575250  | -1.5218680 |
| C   | 1.9973760  | 1.5240910  | 1.3054490  |
| H   | 3.8745760  | 0.6791190  | 2.0269520  |
| H   | 2.4353580  | -0.2129570 | 2.4905940  |
| H   | 3.3233670  | 2.7866220  | 0.1260390  |
| H   | 1.6085830  | 3.0579190  | -0.1210410 |
| H   | 2.0166360  | 2.2358540  | 2.1373120  |
| H   | 0.9594460  | 1.1904200  | 1.2281820  |
| N   | 2.0138720  | -0.8483000 | -0.3990730 |
| N   | -1.6393040 | -0.9714930 | -0.4308310 |
| O   | 0.6223490  | -0.0314590 | -1.9989910 |
| H   | -0.9463060 | -0.5463120 | -1.0595420 |

|   |            |            |            |
|---|------------|------------|------------|
| C | -1.9818420 | 0.0790470  | 0.7261530  |
| H | -2.3687910 | -0.5509080 | 1.5594800  |
| O | -1.2110390 | 1.0281490  | 0.9286060  |
| N | -3.4255820 | 0.4122850  | -0.1282480 |
| H | -2.8223960 | -0.6078570 | -0.7246590 |
| C | -3.3112820 | 1.7046100  | -0.7992540 |
| H | -3.1327000 | 2.5038880  | -0.0708490 |
| H | -2.4621650 | 1.6902660  | -1.4841110 |
| H | -4.2220060 | 1.9180510  | -1.3663690 |
| C | -4.6267280 | 0.2947590  | 0.6881820  |
| H | -4.6583420 | -0.6880520 | 1.1650150  |
| H | -4.6537270 | 1.0613470  | 1.4752840  |
| H | -5.5262870 | 0.4017620  | 0.0731160  |

## Structure 2

| Tag | X          | Y          | Z          |
|-----|------------|------------|------------|
| C   | 1.7894140  | 0.5216330  | 0.7964800  |
| C   | 1.3028830  | 1.5069860  | -0.2780140 |
| C   | 0.4308190  | 0.8827480  | -1.3761320 |
| H   | 0.9746260  | 0.0675970  | -1.8534470 |
| H   | 0.9462520  | 0.1588490  | 1.3906490  |
| H   | 2.4790590  | 1.0334660  | 1.4686890  |
| H   | 2.1781460  | 1.9514860  | -0.7636550 |
| H   | 0.7642450  | 2.3266020  | 0.2124670  |
| H   | 0.2229580  | 1.6334310  | -2.1440430 |
| C   | -0.9796820 | -1.0031970 | -0.6900660 |
| C   | -2.0184630 | 1.2343080  | -0.8283040 |
| C   | -2.3832330 | -1.5141270 | -0.3750550 |
| C   | -2.5052290 | 1.4909580  | 0.6146410  |
| H   | -2.8385050 | 0.8275340  | -1.4269470 |
| H   | -1.7416420 | 2.1796260  | -1.2969340 |
| C   | -2.9744080 | -1.0409800 | 0.9843510  |
| H   | -3.0490900 | -1.2241100 | -1.1933710 |
| C   | -2.3946080 | 0.2693630  | 1.5377880  |
| H   | -3.5450410 | 1.8330190  | 0.5613400  |
| H   | -1.9310170 | 2.3113780  | 1.0565880  |
| H   | -4.0611370 | -0.9535600 | 0.8835420  |
| H   | -2.7985530 | -1.8222880 | 1.7285700  |
| H   | -2.8866370 | 0.4995020  | 2.4877600  |
| H   | -1.3399880 | 0.1082140  | 1.7813850  |
| N   | -0.8596440 | 0.3399170  | -0.9290710 |
| N   | 2.4897340  | -0.6289220 | 0.2494540  |
| C   | 3.8428090  | -0.7109570 | 0.2104440  |
| O   | 4.6159240  | 0.1330590  | 0.6236980  |
| H   | 4.1857360  | -1.6596720 | -0.2454030 |
| O   | -0.0206420 | -1.7712800 | -0.7384810 |
| H   | 1.9164710  | -1.3621250 | -0.1537900 |
| H   | -2.3105850 | -2.6005540 | -0.3946190 |

## MinB-1

| Tag | X          | Y         | Z          |
|-----|------------|-----------|------------|
| C   | -0.5858140 | 2.5529280 | -0.0686510 |
| C   | -1.5993420 | 2.3953150 | 1.0666680  |
| C   | -2.8336410 | 1.6700130 | 0.5393810  |
| H   | -3.4472890 | 2.3540210 | -0.0634620 |

|   |            |            |            |
|---|------------|------------|------------|
| H | 0.3344380  | 3.0125040  | 0.3047470  |
| H | -0.9856340 | 3.2406720  | -0.8284740 |
| H | -1.8871760 | 3.3641490  | 1.4848550  |
| H | -1.1445850 | 1.8096610  | 1.8720910  |
| H | -3.4575500 | 1.3284100  | 1.3717940  |
| C | -1.1631700 | 0.3812970  | -0.7581580 |
| C | -3.4101670 | -0.5891520 | -0.3715630 |
| C | -0.8398150 | -0.9387050 | -1.4299050 |
| C | -3.1419210 | -1.7593110 | 0.6009360  |
| H | -3.4210980 | -0.9578820 | -1.3993280 |
| H | -4.4045940 | -0.1716510 | -0.1945650 |
| C | -0.8088270 | -2.1759060 | -0.4847770 |
| H | -1.5575700 | -1.1004200 | -2.2404720 |
| C | -1.6471840 | -2.0542110 | 0.7978010  |
| H | -3.6609460 | -2.6452520 | 0.2163500  |
| H | -3.5880980 | -1.5406290 | 1.5775780  |
| H | -1.1245370 | -3.0582770 | -1.0528540 |
| H | 0.2257840  | -2.3485960 | -0.1792810 |
| H | -1.5402120 | -2.9778200 | 1.3750470  |
| H | -1.2103610 | -1.2662690 | 1.4196670  |
| N | -2.4486430 | 0.5071130  | -0.2657760 |
| N | -0.2426940 | 1.2826760  | -0.6989330 |
| C | 2.6302610  | -0.5575040 | 0.1895900  |
| O | 2.4996960  | -1.6916390 | 0.6246380  |
| H | 1.7768310  | 0.0600560  | -0.1376340 |
| N | 3.8205080  | 0.0925220  | 0.0492910  |
| H | 0.1320910  | -0.8098830 | -1.9037050 |
| C | 3.8782910  | 1.4342990  | -0.4992350 |
| H | 2.8719960  | 1.7538210  | -0.7740810 |
| H | 4.2889690  | 2.1435700  | 0.2294150  |
| H | 4.5091690  | 1.4638200  | -1.3953840 |
| C | 5.0634830  | -0.5494290 | 0.4370550  |
| H | 5.5744110  | 0.0294570  | 1.2148150  |
| H | 4.8241060  | -1.5395670 | 0.8208980  |
| H | 5.7371600  | -0.6447560 | -0.4220520 |

#### TsB-12

| Tag | X          | Y          | Z          |
|-----|------------|------------|------------|
| C   | -0.1237040 | -2.1297260 | -0.9900650 |
| C   | -1.5895970 | -2.4355660 | -0.7001140 |
| C   | -1.8939030 | -1.9918440 | 0.7306150  |
| H   | -1.2462090 | -2.5187990 | 1.4397390  |
| H   | 0.0536640  | -2.0459030 | -2.0671870 |
| H   | 0.5017050  | -2.9531640 | -0.6244080 |
| H   | -1.7814920 | -3.5018090 | -0.8479000 |
| H   | -2.2406680 | -1.8902630 | -1.3900080 |
| H   | -2.9258610 | -2.2008040 | 1.0174530  |
| C   | -0.4453430 | -0.0657370 | 0.3847620  |
| C   | -2.8710610 | 0.2614850  | 0.5349140  |
| C   | -0.0822050 | 1.2537860  | 0.7530740  |
| C   | -2.7450690 | 1.7769840  | 0.2655680  |
| H   | -3.5787350 | 0.1141420  | 1.3574720  |
| H   | -3.3337240 | -0.1813160 | -0.3611940 |
| C   | -0.2790370 | 2.3101940  | -0.3341030 |

|   |            |            |            |
|---|------------|------------|------------|
| H | -0.6294940 | 1.5267520  | 1.6535820  |
| C | -1.7524610 | 2.2272000  | -0.8319760 |
| H | -2.5389150 | 2.3107100  | 1.1971000  |
| H | -3.7572000 | 2.0754510  | -0.0340390 |
| H | -0.0853450 | 3.3029150  | 0.0867150  |
| H | 0.4005480  | 2.1696350  | -1.1763930 |
| H | -2.0826950 | 3.1921110  | -1.2351820 |
| H | -1.8052560 | 1.5161190  | -1.6662960 |
| N | -1.6568750 | -0.5494460 | 0.8480490  |
| N | 0.3443630  | -0.8888160 | -0.3500380 |
| C | 1.7428220  | -0.5160530 | -0.8753360 |
| O | 1.8153070  | 0.2377730  | -1.8515260 |
| H | 2.3017380  | -1.4795420 | -0.8580170 |
| N | 2.4780240  | 0.2089280  | 0.5667550  |
| H | 1.6315190  | 0.8187400  | 0.8600030  |
| C | 2.7858110  | -0.7629800 | 1.6160120  |
| H | 1.8579970  | -1.2089020 | 1.9763250  |
| H | 3.4320460  | -1.5527290 | 1.2200090  |
| H | 3.2941550  | -0.2856360 | 2.4589210  |
| C | 3.6143510  | 1.0355560  | 0.1525520  |
| H | 4.4845520  | 0.4057290  | -0.0538530 |
| H | 3.3330080  | 1.5532590  | -0.7638940 |
| H | 3.8699990  | 1.7566530  | 0.9344860  |

#### MinB-2

| Tag | X          | Y          | Z          |
|-----|------------|------------|------------|
| C   | -1.7811350 | -1.7191870 | -0.8023560 |
| C   | -2.5160770 | -2.0697610 | 0.5079810  |
| C   | -2.0538370 | -1.1493880 | 1.6697560  |
| H   | -1.2502000 | -1.6399190 | 2.2239950  |
| H   | -2.3949170 | -1.0523160 | -1.4159780 |
| H   | -1.5568810 | -2.6005170 | -1.4004400 |
| H   | -2.3246270 | -3.1093830 | 0.7865630  |
| H   | -3.5929590 | -1.9822950 | 0.3413330  |
| H   | -2.8647550 | -0.9721120 | 2.3793020  |
| C   | -0.4961520 | 0.0745610  | 0.2905160  |
| C   | -2.5687470 | 1.1467150  | 0.8297420  |
| C   | 0.2758750  | 1.1839490  | 0.1105960  |
| C   | -2.1048510 | 2.4392730  | 0.1075810  |
| H   | -3.0939540 | 1.4397420  | 1.7441920  |
| H   | -3.3135500 | 0.6598090  | 0.1795000  |
| C   | 0.1431390  | 1.9479510  | -1.1886450 |
| H   | 0.2675730  | 1.8267420  | 0.9856450  |
| C   | -1.3798230 | 2.3217940  | -1.2673810 |
| H   | -1.5132950 | 3.0527840  | 0.7926770  |
| H   | -3.0341960 | 2.9956220  | -0.0619010 |
| H   | 0.7604910  | 2.8501160  | -1.1728540 |
| H   | 0.4311690  | 1.3815630  | -2.0771220 |
| H   | -1.5123560 | 3.2659940  | -1.8076090 |
| H   | -1.8934500 | 1.5552190  | -1.8599210 |
| N   | -1.5312890 | 0.1414950  | 1.2141340  |
| N   | -0.4946260 | -1.0527420 | -0.5409630 |
| C   | 0.6729420  | -1.5645750 | -1.0976950 |
| O   | 0.6844010  | -2.4762070 | -1.8967850 |
| H   | 1.5773630  | -1.0682400 | -0.7152790 |

|   |           |            |            |
|---|-----------|------------|------------|
| N | 3.5150060 | 0.0224580  | 0.4141860  |
| H | 2.6803440 | 0.6017900  | 0.4608340  |
| C | 3.9260340 | -0.3669380 | 1.7556450  |
| H | 3.0758090 | -0.7979840 | 2.2896700  |
| H | 4.7042100 | -1.1348010 | 1.6953600  |
| H | 4.3272990 | 0.4653790  | 2.3616020  |
| C | 4.5623980 | 0.7018480  | -0.3352890 |
| H | 5.3885950 | 0.0087190  | -0.5237230 |
| H | 4.1732370 | 1.0222410  | -1.3045580 |
| H | 4.9816150 | 1.5855790  | 0.1788030  |

#### Structure 4

| Tag | X          | Y          | Z          |
|-----|------------|------------|------------|
| C   | 1.5733180  | 0.5328080  | 1.0064210  |
| C   | 1.5697760  | 1.9902600  | 0.4946580  |
| C   | 0.6420810  | 2.1536180  | -0.7388050 |
| H   | 1.2235600  | 2.0124920  | -1.6530060 |
| H   | 0.8980480  | 0.4284420  | 1.8614080  |
| H   | 2.5615520  | 0.2102760  | 1.3295990  |
| H   | 2.5807620  | 2.2995540  | 0.2164710  |
| H   | 1.2544990  | 2.6466110  | 1.3098810  |
| H   | 0.2225660  | 3.1610540  | -0.7829600 |
| C   | -0.0536190 | -0.1540230 | -0.7254000 |
| C   | -1.5762090 | 1.4502700  | 0.1702110  |
| C   | -0.9408410 | -1.1033140 | -1.1190430 |
| C   | -2.6447090 | 0.3416030  | 0.3652500  |
| H   | -2.0856560 | 2.3528950  | -0.1815630 |
| H   | -1.1651410 | 1.6866950  | 1.1653320  |
| C   | -1.5383410 | -2.0211720 | -0.0784230 |
| H   | -1.6690150 | -0.7182650 | -1.8253520 |
| C   | -2.2130860 | -1.0405760 | 0.9475930  |
| H   | -3.2009500 | 0.1996230  | -0.5654480 |
| H   | -3.3573060 | 0.7810220  | 1.0732790  |
| H   | -2.2818010 | -2.6850590 | -0.5268110 |
| H   | -0.8161250 | -2.6567220 | 0.4390320  |
| H   | -3.0930310 | -1.5109770 | 1.4008630  |
| H   | -1.5063680 | -0.8596800 | 1.7662510  |
| N   | -0.4499000 | 1.1780850  | -0.7749740 |
| N   | 1.1445340  | -0.4124930 | -0.0366810 |
| C   | 1.9363850  | -1.5018330 | -0.3498910 |
| O   | 2.9372380  | -1.8188540 | 0.2556280  |
| H   | 1.5455300  | -2.0421200 | -1.2258340 |

#### minB-3

| Tag | X          | Y         | Z          |
|-----|------------|-----------|------------|
| C   | -1.9155490 | 0.7081000 | -0.9061090 |
| C   | -1.4043440 | 2.1601090 | -0.7798920 |
| C   | -0.1583440 | 2.2521980 | 0.1383150  |
| H   | -0.4746500 | 2.4520170 | 1.1648760  |
| H   | -1.5656660 | 0.2598020 | -1.8409850 |
| H   | -3.0026590 | 0.6520090 | -0.9056050 |
| H   | -2.1866050 | 2.8041810 | -0.3700850 |
| H   | -1.1794270 | 2.5400390 | -1.7795160 |
| H   | 0.4894010  | 3.0785450 | -0.1615100 |

|   |            |            |            |
|---|------------|------------|------------|
| C | -0.0908590 | -0.1315720 | 0.5453540  |
| C | 1.4062530  | 0.7357680  | -1.0893500 |
| C | 0.6173880  | -1.2149930 | 0.9392080  |
| C | 2.0904490  | -0.6513080 | -1.2163150 |
| H | 2.1829450  | 1.5026090  | -1.1583090 |
| H | 0.7420650  | 0.8688570  | -1.9562810 |
| C | 0.6299800  | -2.4527050 | 0.0767480  |
| H | 1.5931250  | -0.9533810 | 1.3320800  |
| C | 1.2053230  | -1.9361580 | -1.2928620 |
| H | 2.8493670  | -0.7441530 | -0.4360450 |
| H | 2.6408700  | -0.5883580 | -2.1623210 |
| H | 1.2790270  | -3.2189650 | 0.5066800  |
| H | -0.3480830 | -2.9121260 | -0.0805870 |
| H | 1.7934640  | -2.7252040 | -1.7738780 |
| H | 0.3625600  | -1.7298210 | -1.9634460 |
| N | 0.6349580  | 1.0152440  | 0.1745030  |
| N | -1.4548880 | -0.1316970 | 0.2108420  |
| C | -2.3707500 | -0.8695320 | 0.9399180  |
| O | -3.5450690 | -0.9719570 | 0.6614420  |
| H | -1.8986640 | -1.3457930 | 1.8130980  |
| O | 3.1795530  | 1.0136110  | 1.7069700  |
| H | 2.2783350  | 1.1299650  | 1.3585950  |
| H | 3.0509500  | 0.8122720  | 2.6384330  |

#### TsB-34

| Tag | X          | Y          | Z          |
|-----|------------|------------|------------|
| C   | 2.4043880  | -1.2234620 | -0.3741160 |
| C   | 1.8822170  | -1.3100030 | 1.0790620  |
| C   | 0.3606000  | -1.4868260 | 1.2746050  |
| H   | 0.1137560  | -1.3368710 | 2.3312860  |
| H   | 2.1875730  | -2.1781550 | -0.8700970 |
| H   | 3.4963280  | -1.1389180 | -0.2948220 |
| H   | 2.2392080  | -0.4442850 | 1.6390680  |
| H   | 2.3495640  | -2.1820260 | 1.5536000  |
| H   | 0.0804270  | -2.5138660 | 1.0342230  |
| C   | -0.6165300 | 0.6928200  | 0.6417010  |
| C   | -1.1467850 | -1.1802310 | -0.7718460 |
| C   | -1.6343720 | 1.5461180  | 0.5507550  |
| C   | -2.6811160 | -1.1801530 | -0.7745980 |
| H   | -0.7897080 | -2.2060500 | -0.8653040 |
| H   | -0.7354260 | -0.6278260 | -1.6212180 |
| C   | -3.0632640 | 1.0758140  | 0.4318270  |
| H   | -1.4288670 | 2.6098180  | 0.4942290  |
| C   | -3.3439840 | 0.2033720  | -0.8079910 |
| H   | -3.0407310 | -1.7384830 | 0.0985620  |
| H   | -3.0015710 | -1.7417650 | -1.6591170 |
| H   | -3.3366560 | 0.5081770  | 1.3305870  |
| H   | -3.7153140 | 1.9521250  | 0.4091130  |
| H   | -4.4271260 | 0.0677340  | -0.8925880 |
| H   | -3.0229100 | 0.7419590  | -1.7070250 |
| N   | -0.5433760 | -0.6400860 | 0.4648900  |
| N   | 1.8763890  | -0.1674440 | -1.2539960 |
| C   | 2.4837240  | 1.0116000  | -1.2069940 |
| O   | 3.1932610  | 1.5002350  | -0.2802570 |
| H   | 2.2360980  | 1.6571500  | -2.0758680 |



|   |           |           |           |
|---|-----------|-----------|-----------|
| O | 0.7342640 | 1.2640920 | 0.9210510 |
| H | 0.7598730 | 2.2247750 | 1.0531620 |
| H | 1.4149220 | 0.9903170 | 0.1851660 |

**MinB-4**

| Tag | X          | Y          | Z          |
|-----|------------|------------|------------|
| C   | -1.9742370 | 0.4715720  | -0.8655060 |
| C   | -1.6259560 | 1.5031630  | 0.2161950  |
| C   | -0.6132300 | 1.0302110  | 1.2712090  |
| H   | -1.0219700 | 0.1735780  | 1.8094340  |
| H   | -1.0870370 | 0.2086490  | -1.4462650 |
| H   | -2.7122480 | 0.8997610  | -1.5456410 |
| H   | -2.5451950 | 1.7781380  | 0.7427030  |
| H   | -1.2694740 | 2.4160530  | -0.2725250 |
| H   | -0.4813490 | 1.8337400  | 2.0072060  |
| C   | 1.1649510  | -0.6504740 | 0.7832350  |
| C   | 1.4402750  | 1.5787990  | -0.0993910 |
| C   | 2.4814770  | -0.9294300 | 0.9681960  |
| C   | 2.8594060  | 1.1965800  | -0.6078960 |
| H   | 1.5130430  | 2.5460310  | 0.4123260  |
| H   | 0.8154080  | 1.7442090  | -0.9881690 |
| C   | 3.2843650  | -1.3626480 | -0.2428720 |
| H   | 2.9857320  | -0.1785200 | 1.5650650  |
| C   | 3.0820930  | -0.1956370 | -1.2694010 |
| H   | 3.5916350  | 1.3432500  | 0.1902910  |
| H   | 3.0827020  | 1.9629450  | -1.3591400 |
| H   | 4.3406840  | -1.4772860 | 0.0140140  |
| H   | 2.9664820  | -2.3084510 | -0.6902800 |
| H   | 3.9383320  | -0.1266410 | -1.9498030 |
| H   | 2.2104620  | -0.4274220 | -1.8921790 |
| N   | 0.7155730  | 0.6320030  | 0.7881080  |
| N   | -2.5320120 | -0.7625820 | -0.3311040 |
| C   | -3.8623460 | -0.9425050 | -0.1356440 |
| O   | -4.7279190 | -0.1278440 | -0.3905880 |
| H   | -4.0889750 | -1.9419230 | 0.2851760  |
| O   | 0.2659680  | -1.5966620 | 0.3037670  |
| H   | 0.6296870  | -2.4561320 | 0.5529480  |
| H   | -1.8780170 | -1.4776720 | -0.0483770 |

**TsB-42**

| Tag | X          | Y          | Z          |
|-----|------------|------------|------------|
| C   | 1.8833210  | 0.2866230  | 0.9784920  |
| C   | 1.4065420  | 1.5098730  | 0.1789950  |
| C   | 0.5302640  | 1.1720460  | -1.0342260 |
| H   | 1.0499040  | 0.4805910  | -1.6930480 |
| H   | 1.0375040  | -0.2179480 | 1.4527320  |
| H   | 2.5603420  | 0.6178480  | 1.7668130  |
| H   | 2.2858950  | 2.0495200  | -0.1867280 |
| H   | 0.8778530  | 2.1911750  | 0.8550730  |
| H   | 0.3296850  | 2.0793740  | -1.6093890 |
| C   | -0.9439710 | -0.7430890 | -0.6913170 |
| C   | -1.8405430 | 1.5754870  | -0.4322150 |
| C   | -1.9838280 | -1.6339300 | -0.2285520 |
| C   | -3.1994030 | 1.0503560  | 0.0206970  |

|   |            |            |            |
|---|------------|------------|------------|
| H | -1.9606890 | 2.1698890  | -1.3461080 |
| H | -1.4561380 | 2.2550950  | 0.3369520  |
| C | -3.0191740 | -1.3454840 | 0.8493660  |
| H | -2.3829220 | -2.1613480 | -1.0974690 |
| C | -3.1328620 | 0.1329230  | 1.2506430  |
| H | -3.6975000 | 0.5299630  | -0.8032600 |
| H | -3.8017720 | 1.9391920  | 0.2341720  |
| H | -4.0038750 | -1.6761130 | 0.4977070  |
| H | -2.8116840 | -1.9417210 | 1.7459230  |
| H | -4.0234510 | 0.2687430  | 1.8711720  |
| H | -2.2806690 | 0.4241600  | 1.8771850  |
| N | -0.7822610 | 0.5819880  | -0.6901570 |
| N | 2.6010030  | -0.6861330 | 0.1688440  |
| C | 3.9523400  | -0.6684170 | 0.0383960  |
| O | 4.7023040  | 0.1138270  | 0.5899080  |
| H | 4.3145860  | -1.4692890 | -0.6343610 |
| O | 0.0393180  | -1.5111300 | -1.1255640 |
| H | -0.6648220 | -2.3224170 | -0.5294260 |
| H | 2.0474610  | -1.3276010 | -0.3851700 |

**GO-Isomer 1:**

| Tag | X          | Y          | Z          |
|-----|------------|------------|------------|
| C   | -6.0962760 | 0.0117860  | -0.0431220 |
| C   | -4.8766450 | -0.6679150 | 0.1111740  |
| C   | -3.6407930 | 0.0583040  | 0.2595570  |
| C   | -3.6582950 | 1.4805380  | 0.1994060  |
| C   | -4.8970130 | 2.1689530  | 0.0386080  |
| C   | -6.1113470 | 1.4641420  | -0.0719710 |
| C   | -2.4195000 | -0.6343040 | 0.4525100  |
| C   | -2.4357400 | 2.2124550  | 0.3212450  |
| C   | -1.2517110 | 1.5192870  | 0.5486120  |
| C   | -1.2101270 | 0.0934500  | 0.6060820  |
| C   | 0.0435940  | -0.6052310 | 0.7249460  |
| C   | 1.2605610  | 0.0515360  | 0.6600540  |
| C   | 1.2921650  | 1.5154610  | 0.8427820  |
| C   | -0.0207790 | 2.2848620  | 0.8259750  |
| C   | -4.8569900 | -2.1291330 | 0.1151620  |
| C   | -3.6300390 | -2.8139320 | 0.2549170  |
| C   | -6.0754770 | -2.8507210 | -0.0244840 |
| C   | -2.3997510 | -2.0928910 | 0.4393340  |
| C   | -3.6221040 | -4.2543590 | 0.2392490  |
| C   | -6.0661980 | -4.3089970 | -0.0278960 |
| C   | -1.2121220 | -2.7884300 | 0.6034190  |
| C   | -2.3715380 | -4.9252270 | 0.3548970  |
| C   | -4.8227320 | -4.9721920 | 0.0996230  |
| C   | 0.0445380  | -2.0799820 | 1.0453040  |
| C   | -1.1843720 | -4.2240310 | 0.5136730  |
| H   | -2.3549280 | -6.0079520 | 0.2975990  |
| H   | -4.7938820 | -6.0699300 | 0.0922280  |
| C   | 1.3046900  | -2.7803480 | 0.5929300  |
| C   | 0.0569730  | -4.9040340 | 0.5232100  |
| C   | 1.2817850  | -4.2201120 | 0.4864350  |
| C   | 2.4994650  | -0.6360000 | 0.5035580  |
| C   | 3.7021230  | 0.0709520  | 0.3510990  |
| C   | 2.4849400  | -2.0873860 | 0.4354920  |

|   |             |            |            |
|---|-------------|------------|------------|
| C | 4.9465890   | -0.6243520 | 0.1474120  |
| C | 3.7213120   | -2.7892410 | 0.2179950  |
| C | 4.9356370   | -2.0923150 | 0.0914490  |
| C | 2.5346890   | 2.2294240  | 0.5400030  |
| C | 3.7080280   | 1.5169130  | 0.3568920  |
| C | 4.9522730   | 2.2248880  | 0.1828480  |
| C | 6.1608170   | 1.5320540  | 0.0246090  |
| C | 6.1544930   | 0.0709030  | -0.0004590 |
| C | -7.3499280  | -0.7093000 | -0.1744570 |
| C | -7.3300830  | -2.1593170 | -0.1621800 |
| C | 3.7199520   | -4.2320230 | 0.1658410  |
| C | 2.4786540   | -4.9103800 | 0.2948310  |
| C | -8.5553810  | -2.8923050 | -0.2904130 |
| C | -8.5326880  | -4.3519760 | -0.2855940 |
| C | -7.3104200  | -5.0222900 | -0.1600920 |
| H | -7.2891090  | -6.1205760 | -0.1592280 |
| H | 2.4672340   | -5.9927060 | 0.2251630  |
| C | 4.9257690   | -4.9334240 | -0.0138630 |
| H | 4.9090850   | -6.0310010 | -0.0511070 |
| C | 6.1590690   | -2.7955830 | -0.0900840 |
| C | 6.1608490   | -4.2530640 | -0.1429420 |
| C | 7.4035710   | -2.0860920 | -0.2218650 |
| C | 7.4113270   | -0.6347460 | -0.1817570 |
| C | 7.4074810   | 2.2458450  | -0.1196490 |
| C | 8.6427820   | 1.5391050  | -0.2835950 |
| C | 8.6396980   | 0.0793570  | -0.3165940 |
| C | -9.8072980  | -2.1882080 | -0.4238900 |
| C | -11.0386920 | -2.9317020 | -0.5469220 |
| C | -9.8316010  | -0.7407870 | -0.4360750 |
| C | -12.2571460 | -2.2172780 | -0.6746950 |
| C | -10.9897420 | -4.3935030 | -0.5369330 |
| C | -11.0881890 | -0.0454320 | -0.5706120 |
| C | -12.2777880 | -0.8154480 | -0.6856480 |
| C | -11.1005040 | 1.4451780  | -0.5877210 |
| C | -12.2884040 | 2.1927920  | -0.7152260 |
| C | -9.8420100  | 2.1593260  | -0.4713570 |
| C | -8.5974070  | 1.4483230  | -0.3335270 |
| C | -9.8320970  | 3.6143930  | -0.4935020 |
| C | -7.3641600  | 2.1674310  | -0.2185930 |
| C | -8.5853000  | -0.0094850 | -0.3133400 |
| C | -8.5958890  | 4.3123890  | -0.3842920 |
| C | -7.3637580  | 3.6256810  | -0.2486070 |
| C | -6.1057920  | 4.3117310  | -0.1422930 |
| C | -4.9064080  | 3.6295650  | -0.0060260 |
| C | -3.6582750  | 4.3230810  | 0.0858830  |
| C | -2.4470240  | 3.6806160  | 0.2320060  |
| C | -1.2063480  | 4.4073490  | 0.3099820  |
| C | 0.0142280   | 3.7475630  | 0.5250250  |
| C | 1.2666800   | 4.3603770  | 0.4827090  |
| C | 2.4995200   | 3.6653220  | 0.4809150  |
| H | 1.3185670   | 5.4333860  | 0.3846700  |
| H | -8.5997220  | 5.4106810  | -0.4062020 |
| H | -6.1031780  | 5.4097520  | -0.1739820 |
| H | -3.6938170  | 5.3981830  | 0.0102950  |

|   |             |            |            |
|---|-------------|------------|------------|
| C | 7.3983580   | 3.7054540  | -0.0962630 |
| C | 8.6306550   | 4.4053570  | -0.2305230 |
| C | 6.1500280   | 4.3834300  | 0.0588810  |
| C | 9.8629680   | 3.7192380  | -0.3870570 |
| C | 11.1106450  | 4.4352890  | -0.5189910 |
| H | 6.1439520   | 5.4821360  | 0.0701410  |
| H | 8.6275930   | 5.5038950  | -0.2118110 |
| H | 11.0932450  | 5.5332430  | -0.4948700 |
| C | 4.9446260   | 3.6891480  | 0.1953400  |
| C | 3.6989250   | 4.3580230  | 0.3301680  |
| H | 3.6871630   | 5.4414210  | 0.2939470  |
| C | 9.8887020   | -0.6371290 | -0.4873440 |
| C | 11.1384150  | 0.0714890  | -0.6188960 |
| C | 9.8761470   | -2.0847730 | -0.5263770 |
| C | 12.3313540  | -0.6836250 | -0.7819880 |
| C | 11.1407710  | 1.5614950  | -0.5827290 |
| C | 11.1113270  | -2.8133200 | -0.6969130 |
| C | 12.3217310  | -2.0852440 | -0.8204640 |
| C | 12.3212960  | 2.3203780  | -0.7044460 |
| C | 9.8795420   | 2.2619610  | -0.4178770 |
| C | 12.3033080  | 3.7449850  | -0.6720390 |
| H | 13.2503970  | 4.2923930  | -0.7711780 |
| C | 7.4089090   | -4.9493510 | -0.3199100 |
| C | 8.6226480   | -4.2629030 | -0.4428270 |
| C | 9.8985710   | -4.9620570 | -0.6188250 |
| C | 11.0749000  | -4.2748260 | -0.7375970 |
| C | 8.6329450   | -2.8036690 | -0.3966050 |
| H | 7.3982200   | -6.0472760 | -0.3562560 |
| H | 9.8827020   | -6.0601100 | -0.6520020 |
| C | -9.8056410  | -5.0668520 | -0.4149250 |
| H | -9.7812000  | -6.1652160 | -0.4101020 |
| C | -11.0837300 | 4.3177550  | -0.6281220 |
| C | -12.2767010 | 3.6159380  | -0.7343980 |
| H | -13.2277730 | 4.1559240  | -0.8359360 |
| H | -11.0731140 | 5.4158940  | -0.6443660 |
| H | 12.0260500  | -4.8090320 | -0.8684000 |
| H | 13.2651190  | -2.6330360 | -0.9492340 |
| H | 13.2916700  | -0.1642170 | -0.8826360 |
| H | 13.2870640  | 1.8163410  | -0.8284340 |
| H | -11.9381750 | -4.9399540 | -0.6323070 |
| H | -13.1980590 | -2.7764820 | -0.7674770 |
| H | -13.2438310 | -0.3069760 | -0.7877090 |
| H | -13.2530780 | 1.6793750  | -0.8034320 |
| C | -1.2458560  | 5.8810080  | 0.0743280  |
| O | -1.8901510  | 6.4462710  | -0.7781030 |
| O | -0.4861110  | 6.5905880  | 0.9526930  |
| H | -0.5914950  | 7.5190180  | 0.6938210  |
| O | 0.1071920   | -2.2039610 | 2.5136050  |
| H | 0.0567240   | -5.9874210 | 0.4665870  |
| O | 0.6307310   | 1.9509020  | 2.0632580  |
| H | -0.6199990  | -1.6804750 | 2.8746980  |

**GO-Isomer 2:**

| Tag | X          | Y          | Z         |
|-----|------------|------------|-----------|
| C   | -6.1346360 | 0.0101600  | 0.0133780 |
| C   | -4.9055810 | -0.6687540 | 0.0200790 |

|   |            |            |            |
|---|------------|------------|------------|
| C | -3.6653620 | 0.0598070  | 0.0525620  |
| C | -3.6886330 | 1.4820340  | 0.0534490  |
| C | -4.9362040 | 2.1701750  | 0.0594220  |
| C | -6.1538490 | 1.4625820  | 0.0437770  |
| C | -2.4301020 | -0.6322210 | 0.0718980  |
| C | -2.4607620 | 2.2130520  | 0.0017250  |
| C | -1.2644950 | 1.5127940  | -0.0848840 |
| C | -1.2159160 | 0.0922650  | 0.0098640  |
| C | 0.0462200  | -0.6004390 | 0.0820020  |
| C | 1.2521880  | 0.0488500  | -0.0841820 |
| C | 1.2716050  | 1.4878360  | -0.4264710 |
| C | -0.0306570 | 2.2590590  | -0.3946160 |
| C | -4.8807220 | -2.1296940 | -0.0226740 |
| C | -3.6445790 | -2.8133300 | 0.0014110  |
| C | -6.1036710 | -2.8527690 | -0.0730370 |
| C | -2.4080790 | -2.0899770 | 0.0896750  |
| C | -3.6303760 | -4.2532630 | -0.0245130 |
| C | -6.0892060 | -4.3109100 | -0.1167750 |
| C | -1.2094560 | -2.7761000 | 0.2065530  |
| C | -2.3708570 | -4.9173700 | 0.0323330  |
| C | -4.8376130 | -4.9723020 | -0.0946570 |
| C | 0.0493260  | -2.0296700 | 0.5777630  |
| C | -1.1789760 | -4.2120530 | 0.1524450  |
| H | -2.3525800 | -6.0005800 | -0.0147510 |
| H | -4.8081080 | -6.0698210 | -0.1200450 |
| C | 1.3136040  | -2.7671900 | 0.2157490  |
| C | 0.0644990  | -4.8900620 | 0.1851880  |
| C | 1.2920880  | -4.2088700 | 0.1757160  |
| C | 2.5057300  | -0.6319350 | 0.0090480  |
| C | 3.7139980  | 0.0708740  | -0.0514400 |
| C | 2.5013980  | -2.0811760 | 0.0912660  |
| C | 4.9741710  | -0.6241820 | -0.0326140 |
| C | 3.7499790  | -2.7884110 | 0.0207860  |
| C | 4.9703210  | -2.0920180 | -0.0188120 |
| C | 2.5298770  | 2.2177140  | -0.2250680 |
| C | 3.7159490  | 1.5155510  | -0.1111450 |
| C | 4.9692410  | 2.2263760  | -0.0801690 |
| C | 6.1885800  | 1.5350370  | -0.0497200 |
| C | 6.1886200  | 0.0730790  | -0.0381160 |
| C | -7.3922860 | -0.7131740 | -0.0293100 |
| C | -7.3672470 | -2.1627750 | -0.0753570 |
| C | 3.7504440  | -4.2320190 | 0.0335380  |
| C | 2.4999060  | -4.9054170 | 0.0879470  |
| C | -8.5969690 | -2.8970270 | -0.1213490 |
| C | -8.5696920 | -4.3561450 | -0.1704770 |
| C | -7.3397190 | -5.0246990 | -0.1686440 |
| H | -7.3170870 | -6.1224470 | -0.2031100 |
| H | 2.4912730  | -5.9897290 | 0.0618190  |
| C | 4.9695390  | -4.9345700 | -0.0043910 |
| H | 4.9577020  | -6.0329190 | -0.0006890 |
| C | 6.2058600  | -2.7957330 | -0.0311170 |
| C | 6.2121770  | -4.2543240 | -0.0296920 |
| C | 7.4559690  | -2.0841830 | -0.0376200 |
| C | 7.4579750  | -0.6319830 | -0.0347580 |

|   |             |            |            |
|---|-------------|------------|------------|
| C | 7.4417320   | 2.2504530  | -0.0442860 |
| C | 8.6888020   | 1.5446130  | -0.0315660 |
| C | 8.6922380   | 0.0841280  | -0.0313090 |
| C | -9.8573360  | -2.1948160 | -0.1181300 |
| C | -11.0929690 | -2.9398150 | -0.1627870 |
| C | -9.8862740  | -0.7479600 | -0.0706320 |
| C | -12.3194400 | -2.2275920 | -0.1569720 |
| C | -11.0395770 | -4.4008180 | -0.2129230 |
| C | -11.1511760 | -0.0545500 | -0.0670550 |
| C | -12.3443680 | -0.8263750 | -0.1100820 |
| C | -11.1675780 | 1.4357220  | -0.0214650 |
| C | -12.3632710 | 2.1816950  | -0.0137820 |
| C | -9.9051990  | 2.1518730  | 0.0135900  |
| C | -8.6521830  | 1.4428440  | 0.0115220  |
| C | -9.8990820  | 3.6066730  | 0.0502940  |
| C | -7.4153220  | 2.1643800  | 0.0433020  |
| C | -8.6360320  | -0.0148040 | -0.0286360 |
| C | -8.6588570  | 4.3069110  | 0.0759560  |
| C | -7.4181050  | 3.6227170  | 0.0701470  |
| C | -6.1552040  | 4.3112960  | 0.0804780  |
| C | -4.9471660  | 3.6314960  | 0.0686780  |
| C | -3.6930000  | 4.3275370  | 0.0602080  |
| C | -2.4741940  | 3.6841830  | 0.0166250  |
| C | -1.2162080  | 4.3952520  | 0.0514110  |
| C | 0.0075950   | 3.7279730  | -0.1307320 |
| C | 1.2580840   | 4.3469210  | -0.1740600 |
| C | 2.4929950   | 3.6549340  | -0.2166610 |
| H | 1.3131430   | 5.4217740  | -0.0995720 |
| H | -8.6674700  | 5.4052170  | 0.0977850  |
| H | -6.1584080  | 5.4098160  | 0.0904630  |
| H | -3.7296300  | 5.4050040  | 0.0573000  |
| C | 7.4266190   | 3.7103490  | -0.0570180 |
| C | 8.6656470   | 4.4116610  | -0.0429120 |
| C | 6.1674070   | 4.3864150  | -0.0930100 |
| C | 9.9086260   | 3.7268870  | -0.0252990 |
| C | 11.1623310  | 4.4446800  | -0.0128150 |
| H | 6.1590860   | 5.4850980  | -0.1109670 |
| H | 8.6595320   | 5.5103500  | -0.0493990 |
| H | 11.1408830  | 5.5428290  | -0.0129160 |
| C | 4.9553260   | 3.6898610  | -0.1162240 |
| C | 3.6989510   | 4.3529850  | -0.1680470 |
| H | 3.6863760   | 5.4370300  | -0.1579190 |
| C | 9.9530060   | -0.6314300 | -0.0302340 |
| C | 11.2084560  | 0.0791640  | -0.0229470 |
| C | 9.9465570   | -2.0799920 | -0.0381200 |
| C | 12.4130090  | -0.6750990 | -0.0248180 |
| C | 11.2042720  | 1.5698730  | -0.0159170 |
| C | 11.1939700  | -2.8074660 | -0.0409620 |
| C | 12.4095380  | -2.0774480 | -0.0341170 |
| C | 12.3895050  | 2.3308000  | -0.0040050 |
| C | 9.9312870   | 2.2691230  | -0.0239920 |
| C | 12.3655110  | 3.7558770  | -0.0015020 |
| H | 13.3168750  | 4.3047660  | 0.0082660  |
| C | 7.4737450   | -4.9494700 | -0.0439180 |
| C | 8.6931880   | -4.2611270 | -0.0482090 |

|   |             |            |            |
|---|-------------|------------|------------|
| C | 9.9820710   | -4.9588210 | -0.0543440 |
| C | 11.1635010  | -4.2697770 | -0.0505550 |
| C | 8.6978220   | -2.8009640 | -0.0420290 |
| H | 7.4693340   | -6.0480760 | -0.0455510 |
| H | 9.9719670   | -6.0574370 | -0.0606910 |
| C | -9.8479400  | -5.0720850 | -0.2171320 |
| H | -9.8212810  | -6.1697650 | -0.2549930 |
| C | -11.1589660 | 4.3079420  | 0.0557530  |
| C | -12.3554640 | 3.6044750  | 0.0253550  |
| H | -13.3126760 | 4.1431420  | 0.0299020  |
| H | -11.1520980 | 5.4058840  | 0.0839620  |
| H | 12.1238320  | -4.8035900 | -0.0540630 |
| H | 13.3622910  | -2.6241850 | -0.0361260 |
| H | 13.3780120  | -0.1546330 | -0.0198440 |
| H | 13.3640310  | 1.8283850  | 0.0032870  |
| H | -11.9913950 | -4.9486330 | -0.2475390 |
| H | -13.2636580 | -2.7879530 | -0.1904690 |
| H | -13.3169460 | -0.3200780 | -0.1079680 |
| H | -13.3311720 | 1.6673640  | -0.0389800 |
| C | -1.2488710  | 5.8667480  | 0.2867090  |
| O | -2.0158690  | 6.6547380  | -0.2181580 |
| O | -0.3206080  | 6.2919050  | 1.1875620  |
| H | -0.4472140  | 7.2510530  | 1.2520320  |
| O | 0.1049690   | -1.9920740 | 2.0530680  |
| H | 0.0649950   | -5.9746280 | 0.1588930  |
| O | 0.5722120   | 1.8586940  | -1.6444220 |
| H | -0.7049660  | -1.5625340 | 2.3567490  |

### Hydrogen bond Interaction of HNMe2 with GO

Isomer1

| Tag | X          | Y          | Z          |
|-----|------------|------------|------------|
| C   | 6.0468440  | 0.1964190  | -0.1743300 |
| C   | 4.8353500  | 0.8583850  | 0.0670470  |
| C   | 3.6012680  | 0.1323870  | 0.2188690  |
| C   | 3.6186590  | -1.3109030 | 0.0874960  |
| C   | 4.8687500  | -1.9787290 | -0.1771170 |
| C   | 6.0662090  | -1.2594680 | -0.2969640 |
| C   | 2.3958540  | 0.8135350  | 0.4507610  |
| C   | 2.4579420  | -2.0567600 | 0.2266120  |
| C   | 1.2184690  | -1.3745420 | 0.6141150  |
| C   | 1.1664220  | 0.1015600  | 0.5571330  |
| C   | -0.0590190 | 0.7371760  | 0.6847680  |
| C   | -1.3052740 | 0.0370810  | 0.5196990  |
| C   | -1.3253260 | -1.3756050 | 0.3623020  |
| C   | -0.0759280 | -2.1376770 | 0.5572970  |
| C   | 4.8108490  | 2.3269760  | 0.1636280  |
| C   | 3.5939890  | 2.9966410  | 0.3739310  |
| C   | 6.0257070  | 3.0566740  | 0.0355480  |
| C   | 2.3639030  | 2.2661430  | 0.5214860  |
| C   | 3.5766460  | 4.4384700  | 0.4656760  |
| C   | 6.0142320  | 4.5117510  | 0.1349450  |
| C   | 1.1734480  | 2.9289940  | 0.7418420  |
| C   | 2.3285700  | 5.0895650  | 0.6543460  |
| C   | 4.7758870  | 5.1639970  | 0.3492120  |

|   |            |            |            |
|---|------------|------------|------------|
| C | -0.0857680 | 2.1815400  | 1.1181020  |
| C | 1.1344540  | 4.3766280  | 0.7659710  |
| H | 2.3080740  | 6.1733870  | 0.6822270  |
| H | 4.7507530  | 6.2595450  | 0.4223900  |
| C | -1.3455990 | 2.9078460  | 0.7178840  |
| C | -0.0996270 | 5.0376160  | 0.8356290  |
| C | -1.3324170 | 4.3434140  | 0.7392050  |
| C | -2.5228950 | 0.7562340  | 0.4114860  |
| C | -3.7328660 | 0.0627420  | 0.1557290  |
| C | -2.5206900 | 2.2103720  | 0.4937580  |
| C | -4.9758800 | 0.7776120  | 0.0336380  |
| C | -3.7578150 | 2.9240140  | 0.3391090  |
| C | -4.9744440 | 2.2342790  | 0.1356020  |
| C | -2.5012960 | -2.0631850 | 0.0899730  |
| C | -3.7307280 | -1.3505240 | 0.0006250  |
| C | -4.9499190 | -2.0550630 | -0.2363870 |
| C | -6.1714770 | -1.3594890 | -0.3227080 |
| C | -6.1796660 | 0.0890330  | -0.1907900 |
| C | 7.2932690  | 0.9303630  | -0.3081130 |
| C | 7.2727310  | 2.3777520  | -0.1947070 |
| C | -3.7683710 | 4.3611990  | 0.4235610  |
| C | -2.5285160 | 5.0375350  | 0.6098870  |
| C | 8.4924230  | 3.1221690  | -0.3195570 |
| C | 8.4695000  | 4.5777940  | -0.2101040 |
| C | 7.2532520  | 5.2348330  | 0.0097490  |
| H | 7.2331040  | 6.3303930  | 0.0887230  |
| H | -2.5276120 | 6.1216070  | 0.6362530  |
| C | -4.9786950 | 5.0703260  | 0.3149890  |
| H | -4.9664310 | 6.1663490  | 0.3845290  |
| C | -6.2002750 | 2.9459700  | 0.0246250  |
| C | -6.2108030 | 4.4011120  | 0.1211860  |
| C | -7.4415230 | 2.2471250  | -0.1840700 |
| C | -7.4404280 | 0.8008380  | -0.2981590 |
| C | -7.4102770 | -2.0670640 | -0.5495600 |
| C | -8.6511990 | -1.3573700 | -0.6392790 |
| C | -8.6616660 | 0.0955860  | -0.5133480 |
| O | 0.5859340  | -1.9093420 | 1.8301650  |
| C | 9.7374650  | 2.4342190  | -0.5547820 |
| C | 10.9624060 | 3.1895620  | -0.6768200 |
| C | 9.7622170  | 0.9908770  | -0.6712420 |
| C | 12.1745810 | 2.4916090  | -0.9085360 |
| C | 10.9136600 | 4.6465180  | -0.5593040 |
| C | 11.0134480 | 0.3135860  | -0.9101090 |
| C | 12.1957560 | 1.0941160  | -1.0215460 |
| C | 11.0285580 | -1.1715780 | -1.0341030 |
| C | 12.2106780 | -1.9003320 | -1.2702330 |
| C | 9.7779840  | -1.8991860 | -0.9091290 |
| C | 8.5397580  | -1.2075640 | -0.6664470 |
| C | 9.7743780  | -3.3519320 | -1.0314760 |
| C | 7.3151480  | -1.9410700 | -0.5436300 |
| C | 8.5238550  | 0.2474900  | -0.5462690 |
| C | 8.5534590  | -4.0644560 | -0.9111460 |
| C | 7.3202910  | -3.3954990 | -0.6691890 |
| C | 6.0840400  | -4.0999860 | -0.5441180 |
| C | 4.8779000  | -3.4358320 | -0.3012380 |



|   |             |            |            |
|---|-------------|------------|------------|
| C | 3.6527910   | -4.1424760 | -0.1832020 |
| C | 2.4414650   | -3.4931260 | 0.0598130  |
| C | 1.2123370   | -4.2144080 | 0.0976920  |
| C | -0.0383920  | -3.5693060 | 0.1545400  |
| C | -1.2432990  | -4.2045150 | -0.0845320 |
| C | -2.4863900  | -3.5144080 | -0.1001240 |
| H | -1.2522280  | -5.2611150 | -0.3250770 |
| H | 8.5591560   | -5.1589810 | -1.0065210 |
| H | 6.0860310   | -5.1945680 | -0.6414030 |
| H | 3.6647250   | -5.2123200 | -0.3392860 |
| C | -7.3862180  | -3.5190520 | -0.6883310 |
| C | -8.6047100  | -4.2096380 | -0.9015370 |
| C | -6.1199570  | -4.1962200 | -0.6082600 |
| C | -9.8490300  | -3.5220490 | -0.9858800 |
| C | -11.0866380 | -4.2303430 | -1.1998480 |
| H | -6.1034610  | -5.2884040 | -0.7240250 |
| H | -8.5920330  | -5.3031000 | -1.0053450 |
| H | -11.0591240 | -5.3240270 | -1.2965030 |
| C | -4.9335790  | -3.5136990 | -0.3949890 |
| C | -3.6664750  | -4.1845130 | -0.3308970 |
| H | -3.6495370  | -5.2587270 | -0.4764280 |
| C | -9.9156160  | 0.8171360  | -0.6110300 |
| C | -11.1584630 | 0.1163170  | -0.8234310 |
| C | -9.9130110  | 2.2603740  | -0.4949560 |
| C | -12.3565940 | 0.8766430  | -0.9090820 |
| C | -11.1481490 | -1.3691980 | -0.9492020 |
| C | -11.1526280 | 2.9940800  | -0.5914620 |
| C | -12.3572170 | 2.2742860  | -0.7967520 |
| C | -12.3216110 | -2.1213680 | -1.1580340 |
| C | -9.8817970  | -2.0730110 | -0.8570080 |
| C | -12.2876450 | -3.5388510 | -1.2811810 |
| H | -13.2279390 | -4.0828660 | -1.4434770 |
| C | -7.4639660  | 5.1041280  | 0.0162710  |
| C | -8.6733870  | 4.4268330  | -0.1785000 |
| C | -9.9545490  | 5.1313150  | -0.2827890 |
| C | -11.1256650 | 4.4521270  | -0.4765510 |
| C | -8.6747010  | 2.9704860  | -0.2857300 |
| H | -7.4600920  | 6.1999780  | 0.0933130  |
| H | -9.9470200  | 6.2268340  | -0.2000690 |
| C | 9.7353460   | 5.3048000  | -0.3394500 |
| H | 9.7101730   | 6.3999130  | -0.2546960 |
| C | 11.0232220  | -4.0363620 | -1.2746160 |
| C | 12.2049440  | -3.3205240 | -1.3889210 |
| H | 13.1529010  | -3.8437360 | -1.5736060 |
| H | 11.0149700  | -5.1308360 | -1.3663400 |
| H | -12.0801080 | 4.9910940  | -0.5527230 |
| H | -13.3042970 | 2.8259380  | -0.8699830 |
| H | -13.3124950 | 0.3639630  | -1.0690660 |
| H | -13.2918930 | -1.6161040 | -1.2303800 |
| H | 11.8570410  | 5.2015160  | -0.6549800 |
| H | 13.1100570  | 3.0597960  | -1.0016190 |
| H | 13.1568950  | 0.5983930  | -1.2019760 |
| H | 13.1682760  | -1.3755370 | -1.3684520 |
| C | 1.2365000   | -5.7252860 | 0.0185970  |

|   |            |            |            |
|---|------------|------------|------------|
| O | 1.6019010  | -6.3242820 | -0.9644060 |
| O | 0.8194720  | -6.3452570 | 1.1201920  |
| H | 0.6840530  | -5.7039430 | 1.9004170  |
| O | -0.1805990 | 2.1764290  | 2.5911860  |
| H | 0.5611910  | 1.6478390  | 2.9138540  |
| H | -0.1156150 | 6.1216340  | 0.8674050  |
| N | 0.5607450  | -4.7540540 | 3.2943120  |
| H | 0.6409430  | -3.7873080 | 2.9816160  |
| C | -0.7438610 | -4.9440830 | 3.9393620  |
| H | -1.5360730 | -4.6418230 | 3.2524770  |
| H | -0.8827580 | -6.0023080 | 4.1757320  |
| H | -0.8459110 | -4.3672960 | 4.8691480  |
| C | 1.6877550  | -5.0666330 | 4.1809630  |
| H | 1.6767630  | -6.1325380 | 4.4227810  |
| H | 2.6256510  | -4.8448890 | 3.6687330  |
| H | 1.6591650  | -4.4995690 | 5.1219540  |

Isomer 2

| Tag | X          | Y          | Z          |
|-----|------------|------------|------------|
| C   | -6.0981510 | -0.0058550 | -0.1814840 |
| C   | -4.8779790 | -0.6771970 | -0.0292760 |
| C   | -3.6451910 | 0.0409570  | 0.1964640  |
| C   | -3.6723010 | 1.4907130  | 0.2127980  |
| C   | -4.9376050 | 2.1633260  | 0.0554960  |
| C   | -6.1326130 | 1.4523550  | -0.1245960 |
| C   | -2.4399310 | -0.6546220 | 0.3616120  |
| C   | -2.5105000 | 2.2335540  | 0.3912180  |
| C   | -1.2624720 | 1.5198510  | 0.6910270  |
| C   | -1.2113470 | 0.0497900  | 0.5299490  |
| C   | 0.0098050  | -0.5965810 | 0.6174400  |
| C   | 1.2562680  | 0.1104450  | 0.4863850  |
| C   | 1.2772340  | 1.5309140  | 0.3990980  |
| C   | 0.0363690  | 2.2926000  | 0.6681450  |
| C   | -4.8437880 | -2.1447030 | -0.1018480 |
| C   | -3.6223470 | -2.8254490 | 0.0443800  |
| C   | -6.0513570 | -2.8671530 | -0.3180840 |
| C   | -2.4023280 | -2.1065670 | 0.2896380  |
| C   | -3.5986860 | -4.2675160 | -0.0198830 |
| C   | -6.0283110 | -4.3236290 | -0.3925670 |
| C   | -1.2165950 | -2.7834450 | 0.4708450  |
| C   | -2.3523490 | -4.9300040 | 0.1421390  |
| C   | -4.7865390 | -4.9862010 | -0.2401470 |
| C   | 0.0251530  | -2.0688510 | 0.9612560  |
| C   | -1.1723630 | -4.2227450 | 0.3690510  |
| H   | -2.3249130 | -6.0122050 | 0.0707750  |
| H   | -4.7510370 | -6.0829080 | -0.2895600 |
| C   | 1.3003780  | -2.7643890 | 0.5348790  |
| C   | 0.0585460  | -4.8930340 | 0.4488400  |
| C   | 1.2934280  | -4.2002400 | 0.4675490  |
| C   | 2.4763970  | -0.6037660 | 0.3400470  |
| C   | 3.6858670  | 0.0975610  | 0.1085140  |
| C   | 2.4794980  | -2.0602400 | 0.3643470  |
| C   | 4.9321370  | -0.6108930 | -0.0322980 |
| C   | 3.7210100  | -2.7669690 | 0.2038370  |
| C   | 4.9377460  | -2.0690050 | 0.0327680  |
| C   | 2.4523650  | 2.2208940  | 0.1245230  |

|   |             |            |            |
|---|-------------|------------|------------|
| C | 3.6804560   | 1.5135900  | -0.0067220 |
| C | 4.8963640   | 2.2263100  | -0.2392060 |
| C | 6.1199480   | 1.5373260  | -0.3454700 |
| C | 6.1336550   | 0.0868190  | -0.2412780 |
| C | -7.3401750  | -0.7298820 | -0.3921980 |
| C | -7.3060640  | -2.1790050 | -0.4618770 |
| C | 3.7363300   | -4.2065830 | 0.2326610  |
| C | 2.4916760   | -4.8910470 | 0.3476190  |
| C | -8.5189380  | -2.9152350 | -0.6731690 |
| C | -8.4815770  | -4.3725490 | -0.7488020 |
| C | -7.2585200  | -5.0389890 | -0.6109850 |
| H | -7.2264060  | -6.1356900 | -0.6662410 |
| H | 2.4890780   | -5.9750400 | 0.3120450  |
| C | 4.9497470   | -4.9088560 | 0.1236060  |
| H | 4.9390570   | -6.0066570 | 0.1548830  |
| C | 6.1668590   | -2.7736500 | -0.0894890 |
| C | 6.1828300   | -4.2306400 | -0.0308840 |
| C | 7.4058760   | -2.0652070 | -0.2763360 |
| C | 7.3978350   | -0.6170170 | -0.3617190 |
| C | 7.3544610   | 2.2543540  | -0.5626710 |
| C | 8.5988590   | 1.5521740  | -0.6650420 |
| C | 8.6161290   | 0.0975670  | -0.5631870 |
| O | -0.6101710  | 1.9726150  | 1.9214910  |
| C | -9.7728280  | -2.2166640 | -0.8088280 |
| C | -10.9910160 | -2.9634480 | -1.0187320 |
| C | -9.8129650  | -0.7711480 | -0.7334390 |
| C | -12.2126400 | -2.2550490 | -1.1451440 |
| C | -10.9265590 | -4.4225360 | -1.0934380 |
| C | -11.0740900 | -0.0828870 | -0.8650410 |
| C | -12.2494420 | -0.8554410 | -1.0691140 |
| C | -11.1062270 | 1.4049540  | -0.7847500 |
| C | -12.2999340 | 2.1438870  | -0.8989500 |
| C | -9.8611100  | 2.1239710  | -0.5817030 |
| C | -8.6121900  | 1.4213410  | -0.4538850 |
| C | -9.8736940  | 3.5796760  | -0.5057780 |
| C | -7.3920930  | 2.1458910  | -0.2567260 |
| C | -8.5802390  | -0.0362370 | -0.5265190 |
| C | -8.6572710  | 4.2839180  | -0.3129240 |
| C | -7.4127950  | 3.6037790  | -0.1880610 |
| C | -6.1793140  | 4.2981030  | -0.0007250 |
| C | -4.9612210  | 3.6204810  | 0.1161010  |
| C | -3.7410330  | 4.3251360  | 0.2727830  |
| C | -2.5040440  | 3.6829910  | 0.3686630  |
| C | -1.2663120  | 4.4137890  | 0.4198900  |
| C | -0.0050610  | 3.7528770  | 0.3665840  |
| C | 1.1899390   | 4.3647040  | 0.0569140  |
| C | 2.4312690   | 3.6719340  | -0.0250380 |
| H | 1.2131900   | 5.4264430  | -0.1380530 |
| H | -8.6753730  | 5.3811580  | -0.2599660 |
| H | -6.1911400  | 5.3957910  | 0.0457620  |
| H | -3.7845710  | 5.4015490  | 0.2640540  |
| C | 7.3228110   | 3.7082500  | -0.6767990 |
| C | 8.5376750   | 4.4078970  | -0.8813210 |
| C | 6.0535200   | 4.3778510  | -0.5787280 |

|   |             |            |            |
|---|-------------|------------|------------|
| C | 9.7852950   | 3.7279490  | -0.9778060 |
| C | 11.0194100  | 4.4454570  | -1.1813010 |
| H | 6.0318860   | 5.4719480  | -0.6731630 |
| H | 8.5197920   | 5.5028220  | -0.9670560 |
| H | 10.9865050  | 5.5403190  | -1.2613140 |
| C | 4.8720690   | 3.6862310  | -0.3686760 |
| C | 3.6015540   | 4.3498110  | -0.2707470 |
| H | 3.5790750   | 5.4274430  | -0.3879580 |
| C | 9.8737070   | -0.6161640 | -0.6715010 |
| C | 11.1133680  | 0.0941520  | -0.8704140 |
| C | 9.8782090   | -2.0612170 | -0.5802630 |
| C | 12.3156140  | -0.6587270 | -0.9652810 |
| C | 11.0956870  | 1.5812990  | -0.9737370 |
| C | 11.1216240  | -2.7870900 | -0.6862390 |
| C | 12.3232250  | -2.0578940 | -0.8757940 |
| C | 12.2652830  | 2.3424110  | -1.1711410 |
| C | 9.8256400   | 2.2772280  | -0.8713250 |
| C | 12.2238750  | 3.7613890  | -1.2731310 |
| H | 13.1613290  | 4.3126080  | -1.4273090 |
| C | 7.4394650   | -4.9257430 | -0.1407730 |
| C | 8.6475080   | -4.2390550 | -0.3113030 |
| C | 9.9324060   | -4.9353090 | -0.4225860 |
| C | 11.1011970  | -4.2470070 | -0.5978820 |
| C | 8.6427040   | -2.7810060 | -0.3884280 |
| H | 7.4396660   | -6.0231150 | -0.0899390 |
| H | 9.9297770   | -6.0322420 | -0.3610950 |
| C | -9.7402350  | -5.0908140 | -0.9664200 |
| H | -9.7031430  | -6.1873460 | -1.0236390 |
| C | -11.1338380 | 4.2749500  | -0.6315060 |
| C | -12.3104850 | 3.5668690  | -0.8219790 |
| H | -13.2668300 | 4.0987270  | -0.9166960 |
| H | -11.1384660 | 5.3717460  | -0.5730990 |
| H | 12.0584850  | -4.7800290 | -0.6799300 |
| H | 13.2732320  | -2.6035000 | -0.9557230 |
| H | 13.2692150  | -0.1385910 | -1.1145440 |
| H | 13.2381290  | 1.8432800  | -1.2510160 |
| H | -11.8649160 | -4.9706680 | -1.2552670 |
| H | -13.1431280 | -2.8165910 | -1.3046550 |
| H | -13.2176570 | -0.3513310 | -1.1720840 |
| H | -13.2537720 | 1.6252710  | -1.0512660 |
| C | -1.3122170  | 5.8992600  | 0.4487190  |
| O | -2.1244130  | 6.6163860  | -0.0969750 |
| O | -0.3287350  | 6.4509810  | 1.2141910  |
| H | -0.4705490  | 7.4075390  | 1.1539490  |
| O | -0.0403030  | -2.2173490 | 2.4015190  |
| H | 0.3323240   | -1.4209050 | 2.8691450  |
| H | 0.0709520   | -5.9766590 | 0.4033460  |
| N | 0.6252600   | -0.0355330 | 3.9857110  |
| H | 0.3095890   | 0.7468020  | 3.4160770  |
| C | -0.3188290  | -0.2405080 | 5.0856600  |
| H | -1.3234990  | -0.3678840 | 4.6792050  |
| H | -0.0574010  | -1.1546730 | 5.6259620  |
| H | -0.3306270  | 0.5919990  | 5.8056560  |
| C | 1.9962250   | 0.1961680  | 4.4382880  |
| H | 2.3733000   | -0.7014600 | 4.9366750  |

|          |            |            |            |
|----------|------------|------------|------------|
| H        | 2.6365760  | 0.3975490  | 3.5775000  |
| H        | 2.0836550  | 1.0378830  | 5.1428930  |
| Isomer 3 |            |            |            |
| Tag      | X          | Y          | Z          |
| C        | -6.0402860 | -0.3956960 | -0.0657040 |
| C        | -4.8198910 | -1.0577860 | 0.1243540  |
| C        | -3.5890190 | -0.3286850 | 0.3091100  |
| C        | -3.6186180 | 1.1200100  | 0.2600980  |
| C        | -4.8812380 | 1.7843600  | 0.0573710  |
| C        | -6.0746640 | 1.0636440  | -0.0925010 |
| C        | -2.3795420 | -1.0137550 | 0.5011410  |
| C        | -2.4606740 | 1.8703990  | 0.4264790  |
| C        | -1.2179380 | 1.1726890  | 0.7756690  |
| C        | -1.1549800 | -0.2991770 | 0.6436390  |
| C        | 0.0723490  | -0.9340990 | 0.7557510  |
| C        | 1.3143440  | -0.2217340 | 0.6293630  |
| C        | 1.3271100  | 1.1972390  | 0.5275860  |
| C        | 0.0770340  | 1.9529720  | 0.7649230  |
| C        | -4.7843270 | -2.5285730 | 0.1369920  |
| C        | -3.5622670 | -3.1995430 | 0.3146410  |
| C        | -5.9930160 | -3.2612780 | -0.0310820 |
| C        | -2.3393910 | -2.4677350 | 0.5056070  |
| C        | -3.5356050 | -4.6436320 | 0.3326110  |
| C        | -5.9693540 | -4.7195050 | -0.0165450 |
| C        | -1.1472950 | -3.1327660 | 0.7092140  |
| C        | -2.2853230 | -5.2948760 | 0.5067830  |
| C        | -4.7266420 | -5.3722050 | 0.1668610  |
| C        | 0.1025450  | -2.3943900 | 1.1320270  |
| C        | -1.1003210 | -4.5788750 | 0.6714020  |
| H        | -2.2569470 | -6.3787750 | 0.4850630  |
| H        | -4.6920860 | -6.4698020 | 0.1810320  |
| C        | 1.3702350  | -3.0989950 | 0.7167990  |
| C        | 0.1362840  | -5.2373120 | 0.7353650  |
| C        | 1.3657650  | -4.5345690 | 0.6849040  |
| C        | 2.5368290  | -0.9318550 | 0.4981300  |
| C        | 3.7445570  | -0.2269950 | 0.2687540  |
| C        | 2.5427340  | -2.3880780 | 0.5279370  |
| C        | 4.9919430  | -0.9310130 | 0.1274050  |
| C        | 3.7849940  | -3.0911220 | 0.3582290  |
| C        | 4.9990850  | -2.3898970 | 0.1842950  |
| C        | 2.5024900  | 1.8920960  | 0.2719140  |
| C        | 3.7352110  | 1.1896190  | 0.1570240  |
| C        | 4.9506390  | 1.9070990  | -0.0587950 |
| C        | 6.1765740  | 1.2217810  | -0.1631660 |
| C        | 6.1926150  | -0.2297150 | -0.0729940 |
| C        | -7.2819100 | -1.1313370 | -0.2338430 |
| C        | -7.2476310 | -2.5822940 | -0.2140390 |
| C        | 3.8036260  | -4.5305040 | 0.3957330  |
| C        | 2.5662340  | -5.2192270 | 0.5464820  |
| C        | -8.4612680 | -3.3291700 | -0.3777160 |
| C        | -8.4243310 | -4.7883170 | -0.3613040 |
| C        | -7.2012330 | -5.4456250 | -0.1853320 |
| H        | -7.1702160 | -6.5436800 | -0.1726880 |
| H        | 2.5701480  | -6.3036140 | 0.5357350  |

|   |             |            |            |
|---|-------------|------------|------------|
| C | 5.0184730   | -5.2296890 | 0.2748090  |
| H | 5.0113430   | -6.3273830 | 0.3097620  |
| C | 6.2296970   | -3.0912840 | 0.0581040  |
| C | 6.2482240   | -4.5484250 | 0.1107430  |
| C | 7.4676120   | -2.3796210 | -0.1238800 |
| C | 7.4580480   | -0.9307210 | -0.1965050 |
| C | 7.4115590   | 1.9426980  | -0.3666250 |
| C | 8.6571240   | 1.2432270  | -0.4722850 |
| C | 8.6758490   | -0.2125880 | -0.3870200 |
| O | -0.5936840  | 1.6495560  | 2.0023150  |
| C | -9.7147680  | -2.6398840 | -0.5570200 |
| C | -10.9335670 | -3.3977130 | -0.7186840 |
| C | -9.7543130  | -1.1924300 | -0.5743620 |
| C | -12.1546810 | -2.6980790 | -0.8907130 |
| C | -10.8699240 | -4.8586320 | -0.6994660 |
| C | -11.0147160 | -0.5133260 | -0.7514540 |
| C | -12.1905670 | -1.2964920 | -0.9056500 |
| C | -11.0459460 | 0.9766290  | -0.7677160 |
| C | -12.2385060 | 1.7075380  | -0.9341020 |
| C | -9.8009780  | 1.7066370  | -0.6061970 |
| C | -8.5528330  | 1.0126750  | -0.4303010 |
| C | -9.8132150  | 3.1643480  | -0.6217560 |
| C | -7.3333880  | 1.7479960  | -0.2720850 |
| C | -8.5214700  | -0.4467120 | -0.4123710 |
| C | -8.5975930  | 3.8789320  | -0.4654810 |
| C | -7.3546330  | 3.2074710  | -0.2907260 |
| C | -6.1227450  | 3.9120680  | -0.1317620 |
| C | -4.9066590  | 3.2429730  | 0.0392150  |
| C | -3.6882620  | 3.9547970  | 0.1819600  |
| C | -2.4565320  | 3.3167060  | 0.3435590  |
| C | -1.2256700  | 4.0531730  | 0.3907610  |
| C | 0.0323800   | 3.4050090  | 0.4273450  |
| C | 1.2387550   | 4.0324180  | 0.1758530  |
| C | 2.4801600   | 3.3453250  | 0.1282480  |
| H | 1.2583070   | 5.0965320  | -0.0076060 |
| H | -8.6155520  | 4.9772850  | -0.4794590 |
| H | -6.1353020  | 5.0106320  | -0.1471920 |
| H | -3.7275070  | 5.0297860  | 0.1120460  |
| C | 7.3792280   | 3.3979790  | -0.4642680 |
| C | 8.5944640   | 4.1012000  | -0.6547360 |
| C | 6.1091390   | 4.0648880  | -0.3670530 |
| C | 9.8430020   | 3.4237310  | -0.7543540 |
| C | 11.0772300  | 4.1447650  | -0.9443460 |
| H | 6.0865840   | 5.1598670  | -0.4499610 |
| H | 8.5757800   | 5.1970290  | -0.7274460 |
| H | 11.0436100  | 5.2405030  | -1.0107350 |
| C | 4.9260570   | 3.3695420  | -0.1746400 |
| C | 3.6555660   | 4.0293940  | -0.0878900 |
| H | 3.6317470   | 5.1079820  | -0.1955670 |
| C | 9.9346030   | -0.9236670 | -0.4996300 |
| C | 11.1740090  | -0.2098790 | -0.6871610 |
| C | 9.9404460   | -2.3695760 | -0.4237900 |
| C | 12.3772310  | -0.9603000 | -0.7880850 |
| C | 11.1551040  | 1.2784330  | -0.7723060 |
| C | 11.1849660  | -3.0928650 | -0.5348480 |

|   |             |            |            |
|---|-------------|------------|------------|
| C | 12.3860540  | -2.3604160 | -0.7143050 |
| C | 12.3247800  | 2.0428800  | -0.9559930 |
| C | 9.8841000   | 1.9718340  | -0.6656010 |
| C | 12.2826180  | 3.4629710  | -1.0403110 |
| H | 13.2201690  | 4.0168230  | -1.1840470 |
| C | 7.5059630   | -5.2409580 | -0.0071690 |
| C | 8.7124540   | -4.5513060 | -0.1751250 |
| C | 9.9983520   | -5.2449430 | -0.2924970 |
| C | 11.1663250  | -4.5536580 | -0.4608870 |
| C | 8.7055740   | -3.0925980 | -0.2405300 |
| H | 7.5080650   | -6.3385960 | 0.0376990  |
| H | 9.9970550   | -6.3423850 | -0.2406960 |
| C | -9.6837860  | -5.5180150 | -0.5309930 |
| H | -9.6474670  | -6.6160090 | -0.5181530 |
| C | -11.0721750 | 3.8507930  | -0.7972740 |
| C | -12.2482860 | 3.1324750  | -0.9481560 |
| H | -13.2038270 | 3.6575920  | -1.0810230 |
| H | -11.0763130 | 4.9490250  | -0.8082050 |
| H | 12.1243770  | -5.0846190 | -0.5471710 |
| H | 13.3368210  | -2.9041120 | -0.7981650 |
| H | 13.3306320  | -0.4375840 | -0.9292980 |
| H | 13.2983010  | 1.5455070  | -1.0384080 |
| H | -11.8086460 | -5.4155010 | -0.8251620 |
| H | -13.0854980 | -3.2681730 | -1.0137210 |
| H | -13.1583550 | -0.7993890 | -1.0412010 |
| H | -13.1920670 | 1.1808070  | -1.0572820 |
| C | -1.2720440  | 5.5524900  | 0.3041490  |
| O | -1.9990330  | 6.1720550  | -0.4563620 |
| O | -0.4478130  | 6.1572160  | 1.1577860  |
| H | -0.5447530  | 7.1632350  | 1.0359570  |
| O | 0.1793530   | -2.4517400 | 2.6034110  |
| H | -0.5242720  | -1.8814600 | 2.9403810  |
| H | 0.1568930   | -6.3218360 | 0.7254950  |
| N | -0.8848940  | 8.7805410  | 0.6729330  |
| H | -1.5770050  | 8.5051430  | -0.0207600 |
| C | -1.5343630  | 9.5249730  | 1.7554810  |
| H | -2.3578850  | 8.9335140  | 2.1596150  |
| H | -0.8150570  | 9.6990840  | 2.5597410  |
| H | -1.9270170  | 10.4990780 | 1.4303670  |
| C | 0.1985670   | 9.5228430  | 0.0233820  |
| H | 1.0059120   | 9.6911210  | 0.7408050  |
| H | 0.5958540   | 8.9341930  | -0.8056680 |
| H | -0.1233280  | 10.5000470 | -0.3642390 |

**Insertion of HNMe<sub>2</sub> on GO:**

**TS:**

| Tag | X         | Y          | Z          |
|-----|-----------|------------|------------|
| C   | 6.0111680 | 0.1146420  | -0.0920980 |
| C   | 4.7826400 | 0.7789910  | 0.1010910  |
| C   | 3.5715460 | 0.0373190  | 0.3247460  |
| C   | 3.6300300 | -1.3759760 | 0.3779190  |
| C   | 4.8182440 | -2.0445730 | 0.0597020  |
| C   | 6.0363480 | -1.3246230 | -0.1466960 |
| C   | 2.3330630 | 0.7171020  | 0.4502180  |

|   |            |            |            |
|---|------------|------------|------------|
| C | 2.4269830  | -2.1684020 | 0.8673420  |
| C | 1.1246460  | -1.4254250 | 0.6401750  |
| C | 1.0984370  | -0.0439880 | 0.5487310  |
| C | -0.1612800 | 0.6628460  | 0.6248030  |
| C | -1.3876930 | -0.0280990 | 0.5056390  |
| C | -1.4030590 | -1.4534010 | 0.4795740  |
| C | -0.1500600 | -2.1976340 | 0.8934130  |
| C | 4.7362810  | 2.2295350  | 0.0738860  |
| C | 3.4973440  | 2.8895780  | 0.2202640  |
| C | 5.9435270  | 2.9730220  | -0.0955850 |
| C | 2.2815270  | 2.1483330  | 0.4095000  |
| C | 3.4693860  | 4.3306240  | 0.1920280  |
| C | 5.9127770  | 4.4303900  | -0.1070100 |
| C | 1.0661310  | 2.8341900  | 0.5783170  |
| C | 2.2148270  | 4.9837380  | 0.3211090  |
| C | 4.6558360  | 5.0717330  | 0.0336920  |
| C | -0.1694450 | 2.1101210  | 1.0256080  |
| C | 1.0287090  | 4.2688520  | 0.4994420  |
| H | 2.1835050  | 6.0673600  | 0.2615020  |
| H | 4.6055430  | 6.1693130  | 0.0194600  |
| C | -1.4273690 | 2.8178920  | 0.6010310  |
| C | -0.1970450 | 4.9622000  | 0.5514390  |
| C | -1.4145170 | 4.2562100  | 0.5325130  |
| C | -2.6157640 | 0.6781920  | 0.3877660  |
| C | -3.8285310 | -0.0288980 | 0.1995260  |
| C | -2.6088110 | 2.1234740  | 0.4037600  |
| C | -5.0681790 | 0.6719450  | 0.0527470  |
| C | -3.8461150 | 2.8245620  | 0.2223790  |
| C | -5.0646630 | 2.1318290  | 0.0708210  |
| C | -2.5733760 | -2.1464620 | 0.2664960  |
| C | -3.8186830 | -1.4462910 | 0.1279430  |
| C | -5.0301000 | -2.1618030 | -0.0591080 |
| C | -6.2618960 | -1.4761510 | -0.1695110 |
| C | -6.2741470 | -0.0268530 | -0.1182190 |
| C | 7.2435560  | 0.8529310  | -0.2780170 |
| C | 7.2033500  | 2.3014900  | -0.2608590 |
| C | -3.8576010 | 4.2644000  | 0.2290850  |
| C | -2.6153350 | 4.9442620  | 0.3672990  |
| C | 8.4153740  | 3.0516660  | -0.4265250 |
| C | 8.3736140  | 4.5085810  | -0.4162260 |
| C | 7.1415970  | 5.1623230  | -0.2622740 |
| H | 7.1047450  | 6.2602850  | -0.2613200 |
| H | -2.6088420 | 6.0302940  | 0.3184460  |
| C | -5.0659290 | 4.9746470  | 0.0920720  |
| H | -5.0494370 | 6.0738740  | 0.1007170  |
| C | -6.2903050 | 2.8381240  | -0.0644560 |
| C | -6.3025560 | 4.2976910  | -0.0498080 |
| C | -7.5348250 | 2.1280100  | -0.2175360 |
| C | -7.5341180 | 0.6781390  | -0.2498070 |
| C | -7.4987360 | -2.1971780 | -0.3407440 |
| C | -8.7435860 | -1.4948860 | -0.4534480 |
| C | -8.7565580 | -0.0393530 | -0.4092410 |
| C | 9.6716300  | 2.3621860  | -0.6088390 |
| C | 10.8878770 | 3.1209170  | -0.7654440 |
| C | 9.7116850  | 0.9154680  | -0.6472020 |



|   |             |            |            |
|---|-------------|------------|------------|
| C | 12.1104680  | 2.4194310  | -0.9487880 |
| C | 10.8219570  | 4.5806030  | -0.7367170 |
| C | 10.9640370  | 0.2342250  | -0.8483640 |
| C | 12.1443420  | 1.0207700  | -0.9898940 |
| C | 10.9841470  | -1.2542110 | -0.9124300 |
| C | 12.1695850  | -1.9917140 | -1.1171140 |
| C | 9.7357510   | -1.9808830 | -0.7700440 |
| C | 8.4960470   | -1.2823180 | -0.5487400 |
| C | 9.7267360   | -3.4317120 | -0.8520220 |
| C | 7.2688910   | -2.0141650 | -0.3990170 |
| C | 8.4770870   | 0.1675650  | -0.4847840 |
| C | 8.4886940   | -4.1406470 | -0.7279130 |
| C | 7.2698160   | -3.4716960 | -0.5065530 |
| C | 5.9998390   | -4.1611180 | -0.4155510 |
| C | 4.8257700   | -3.5005080 | -0.1488640 |
| C | 3.5447350   | -4.1687890 | -0.1706410 |
| C | 2.3882800   | -3.5752520 | 0.2410290  |
| C | 1.1332160   | -4.2510530 | 0.1859640  |
| C | -0.1079960  | -3.6155560 | 0.3322840  |
| C | -1.3050540  | -4.2613740 | 0.0781160  |
| C | -2.5610480  | -3.6036970 | 0.1196180  |
| H | -1.3030200  | -5.2947900 | -0.2473510 |
| H | 8.4968470   | -5.2360850 | -0.8107150 |
| H | 5.9875440   | -5.2468410 | -0.5816860 |
| H | 3.5144180   | -5.1575250 | -0.6047430 |
| C | -7.4716140  | -3.6548800 | -0.4000640 |
| C | -8.6879430  | -4.3560470 | -0.5579830 |
| C | -6.1955050  | -4.3235690 | -0.3016030 |
| C | -9.9392570  | -3.6758570 | -0.6633170 |
| C | -11.1757580 | -4.3965050 | -0.8206740 |
| H | -6.1791070  | -5.4202690 | -0.3611770 |
| H | -8.6757840  | -5.4536380 | -0.6021750 |
| H | -11.1473750 | -5.4939160 | -0.8570280 |
| C | -5.0131430  | -3.6310390 | -0.1423940 |
| C | -3.7341920  | -4.2881730 | -0.0751600 |
| H | -3.7095340  | -5.3648530 | -0.2002920 |
| C | -10.0123160 | 0.6758990  | -0.5306480 |
| C | -11.2561910 | -0.0373830 | -0.6863950 |
| C | -10.0098090 | 2.1237320  | -0.4961340 |
| C | -12.4566950 | 0.7175710  | -0.7981250 |
| C | -11.2440450 | -1.5273250 | -0.7289340 |
| C | -11.2506330 | 2.8504870  | -0.6169490 |
| C | -12.4575340 | 2.1190690  | -0.7647210 |
| C | -12.4189880 | -2.2923650 | -0.8796080 |
| C | -9.9755070  | -2.2232350 | -0.6148140 |
| C | -12.3816160 | -3.7130380 | -0.9240260 |
| H | -13.3216970 | -4.2684450 | -1.0429850 |
| C | -7.5565540  | 4.9951880  | -0.1784700 |
| C | -8.7681420  | 4.3067870  | -0.3191940 |
| C | -10.0514700 | 5.0033770  | -0.4461210 |
| C | -11.2239600 | 4.3127430  | -0.5851110 |
| C | -8.7687610  | 2.8459700  | -0.3437520 |
| H | -7.5524120  | 6.0937480  | -0.1631240 |
| H | -10.0446260 | 6.1017720  | -0.4256470 |

|   |             |            |            |
|---|-------------|------------|------------|
| C | 9.6329670   | 5.2394850  | -0.5749310 |
| H | 9.5965070   | 6.3374160  | -0.5612450 |
| C | 10.9693700  | -4.1215390 | -1.0655910 |
| C | 12.1588510  | -3.4100830 | -1.1908010 |
| H | 13.1050590  | -3.9439650 | -1.3522390 |
| H | 10.9628560  | -5.2181370 | -1.1277610 |
| H | -12.1801090 | 4.8460840  | -0.6786830 |
| H | -13.4062300 | 2.6653180  | -0.8558350 |
| H | -13.4142580 | 0.1963050  | -0.9158090 |
| H | -13.3916090 | -1.7937780 | -0.9666190 |
| H | 11.7600980  | 5.1402650  | -0.8551330 |
| H | 13.0414190  | 2.9908530  | -1.0652240 |
| H | 13.1101190  | 0.5233720  | -1.1394200 |
| H | 13.1281110  | -1.4707270 | -1.2264150 |
| C | 1.1440590   | -5.7459640 | -0.0165120 |
| O | 1.6043190   | -6.3194520 | -0.9651990 |
| O | 0.5969300   | -6.4566630 | 1.0054280  |
| H | 0.2535970   | -5.8461950 | 1.6718610  |
| O | -0.2311680  | 2.1448780  | 2.5156560  |
| H | 0.6048740   | 1.7888940  | 2.8426400  |
| H | -0.2025520  | 6.0447460  | 0.5245790  |
| O | -0.2901210  | -2.3466840 | 2.3423690  |
| H | 1.1073054   | -2.5008592 | 2.7963498  |
| N | 2.5070900   | -2.3892690 | 2.4095370  |
| C | 3.5197960   | -3.3387900 | 2.8889230  |
| H | 3.3918740   | -4.3121600 | 2.4228180  |
| H | 4.5500520   | -2.9972470 | 2.7170320  |
| H | 3.3791760   | -3.4545350 | 3.9660590  |
| C | 2.5952100   | -1.1523270 | 3.2039090  |
| H | 1.7715970   | -0.4851040 | 2.9620990  |
| H | 2.4963840   | -1.4282060 | 4.2562140  |
| H | 3.5461280   | -0.6184940 | 3.0774320  |

**Product:**

| Tag | X          | Y          | Z          |
|-----|------------|------------|------------|
| C   | 6.0111680  | 0.1146420  | -0.0920980 |
| C   | 4.7826400  | 0.7789910  | 0.1010910  |
| C   | 3.5715460  | 0.0373190  | 0.3247460  |
| C   | 3.6300300  | -1.3759760 | 0.3779190  |
| C   | 4.8182440  | -2.0445730 | 0.0597020  |
| C   | 6.0363480  | -1.3246230 | -0.1466960 |
| C   | 2.3330630  | 0.7171020  | 0.4502180  |
| C   | 2.4269830  | -2.1684020 | 0.8673420  |
| C   | 1.1246460  | -1.4254250 | 0.6401750  |
| C   | 1.0984370  | -0.0439880 | 0.5487310  |
| C   | -0.1612800 | 0.6628460  | 0.6248030  |
| C   | -1.3876930 | -0.0280990 | 0.5056390  |
| C   | -1.4030590 | -1.4534010 | 0.4795740  |
| C   | -0.1500600 | -2.1976340 | 0.8934130  |
| C   | 4.7362810  | 2.2295350  | 0.0738860  |
| C   | 3.4973440  | 2.8895780  | 0.2202640  |
| C   | 5.9435270  | 2.9730220  | -0.0955850 |
| C   | 2.2815270  | 2.1483330  | 0.4095000  |
| C   | 3.4693860  | 4.3306240  | 0.1920280  |
| C   | 5.9127770  | 4.4303900  | -0.1070100 |
| C   | 1.0661310  | 2.8341900  | 0.5783170  |

|   |            |            |            |
|---|------------|------------|------------|
| C | 2.2148270  | 4.9837380  | 0.3211090  |
| C | 4.6558360  | 5.0717330  | 0.0336920  |
| C | -0.1694450 | 2.1101210  | 1.0256080  |
| C | 1.0287090  | 4.2688520  | 0.4994420  |
| H | 2.1835050  | 6.0673600  | 0.2615020  |
| H | 4.6055430  | 6.1693130  | 0.0194600  |
| C | -1.4273690 | 2.8178920  | 0.6010310  |
| C | -0.1970450 | 4.9622000  | 0.5514390  |
| C | -1.4145170 | 4.2562100  | 0.5325130  |
| C | -2.6157640 | 0.6781920  | 0.3877660  |
| C | -3.8285310 | -0.0288980 | 0.1995260  |
| C | -2.6088110 | 2.1234740  | 0.4037600  |
| C | -5.0681790 | 0.6719450  | 0.0527470  |
| C | -3.8461150 | 2.8245620  | 0.2223790  |
| C | -5.0646630 | 2.1318290  | 0.0708210  |
| C | -2.5733760 | -2.1464620 | 0.2664960  |
| C | -3.8186830 | -1.4462910 | 0.1279430  |
| C | -5.0301000 | -2.1618030 | -0.0591080 |
| C | -6.2618960 | -1.4761510 | -0.1695110 |
| C | -6.2741470 | -0.0268530 | -0.1182190 |
| C | 7.2435560  | 0.8529310  | -0.2780170 |
| C | 7.2033500  | 2.3014900  | -0.2608590 |
| C | -3.8576010 | 4.2644000  | 0.2290850  |
| C | -2.6153350 | 4.9442620  | 0.3672990  |
| C | 8.4153740  | 3.0516660  | -0.4265250 |
| C | 8.3736140  | 4.5085810  | -0.4162260 |
| C | 7.1415970  | 5.1623230  | -0.2622740 |
| H | 7.1047450  | 6.2602850  | -0.2613200 |
| H | -2.6088420 | 6.0302940  | 0.3184460  |
| C | -5.0659290 | 4.9746470  | 0.0920720  |
| H | -5.0494370 | 6.0738740  | 0.1007170  |
| C | -6.2903050 | 2.8381240  | -0.0644560 |
| C | -6.3025560 | 4.2976910  | -0.0498080 |
| C | -7.5348250 | 2.1280100  | -0.2175360 |
| C | -7.5341180 | 0.6781390  | -0.2498070 |
| C | -7.4987360 | -2.1971780 | -0.3407440 |
| C | -8.7435860 | -1.4948860 | -0.4534480 |
| C | -8.7565580 | -0.0393530 | -0.4092410 |
| C | 9.6716300  | 2.3621860  | -0.6088390 |
| C | 10.8878770 | 3.1209170  | -0.7654440 |
| C | 9.7116850  | 0.9154680  | -0.6472020 |
| C | 12.1104680 | 2.4194310  | -0.9487880 |
| C | 10.8219570 | 4.5806030  | -0.7367170 |
| C | 10.9640370 | 0.2342250  | -0.8483640 |
| C | 12.1443420 | 1.0207700  | -0.9898940 |
| C | 10.9841470 | -1.2542110 | -0.9124300 |
| C | 12.1695850 | -1.9917140 | -1.1171140 |
| C | 9.7357510  | -1.9808830 | -0.7700440 |
| C | 8.4960470  | -1.2823180 | -0.5487400 |
| C | 9.7267360  | -3.4317120 | -0.8520220 |
| C | 7.2688910  | -2.0141650 | -0.3990170 |
| C | 8.4770870  | 0.1675650  | -0.4847840 |
| C | 8.4886940  | -4.1406470 | -0.7279130 |
| C | 7.2698160  | -3.4716960 | -0.5065530 |

|   |             |            |            |
|---|-------------|------------|------------|
| C | 5.9998390   | -4.1611180 | -0.4155510 |
| C | 4.8257700   | -3.5005080 | -0.1488640 |
| C | 3.5447350   | -4.1687890 | -0.1706410 |
| C | 2.3882800   | -3.5752520 | 0.2410290  |
| C | 1.1332160   | -4.2510530 | 0.1859640  |
| C | -0.1079960  | -3.6155560 | 0.3322840  |
| C | -1.3050540  | -4.2613740 | 0.0781160  |
| C | -2.5610480  | -3.6036970 | 0.1196180  |
| H | -1.3030200  | -5.2947900 | -0.2473510 |
| H | 8.4968470   | -5.2360850 | -0.8107150 |
| H | 5.9875440   | -5.2468410 | -0.5816860 |
| H | 3.5144180   | -5.1575250 | -0.6047430 |
| C | -7.4716140  | -3.6548800 | -0.4000640 |
| C | -8.6879430  | -4.3560470 | -0.5579830 |
| C | -6.1955050  | -4.3235690 | -0.3016030 |
| C | -9.9392570  | -3.6758570 | -0.6633170 |
| C | -11.1757580 | -4.3965050 | -0.8206740 |
| H | -6.1791070  | -5.4202690 | -0.3611770 |
| H | -8.6757840  | -5.4536380 | -0.6021750 |
| H | -11.1473750 | -5.4939160 | -0.8570280 |
| C | -5.0131430  | -3.6310390 | -0.1423940 |
| C | -3.7341920  | -4.2881730 | -0.0751600 |
| H | -3.7095340  | -5.3648530 | -0.2002920 |
| C | -10.0123160 | 0.6758990  | -0.5306480 |
| C | -11.2561910 | -0.0373830 | -0.6863950 |
| C | -10.0098090 | 2.1237320  | -0.4961340 |
| C | -12.4566950 | 0.7175710  | -0.7981250 |
| C | -11.2440450 | -1.5273250 | -0.7289340 |
| C | -11.2506330 | 2.8504870  | -0.6169490 |
| C | -12.4575340 | 2.1190690  | -0.7647210 |
| C | -12.4189880 | -2.2923650 | -0.8796080 |
| C | -9.9755070  | -2.2232350 | -0.6148140 |
| C | -12.3816160 | -3.7130380 | -0.9240260 |
| H | -13.3216970 | -4.2684450 | -1.0429850 |
| C | -7.5565540  | 4.9951880  | -0.1784700 |
| C | -8.7681420  | 4.3067870  | -0.3191940 |
| C | -10.0514700 | 5.0033770  | -0.4461210 |
| C | -11.2239600 | 4.3127430  | -0.5851110 |
| C | -8.7687610  | 2.8459700  | -0.3437520 |
| H | -7.5524120  | 6.0937480  | -0.1631240 |
| H | -10.0446260 | 6.1017720  | -0.4256470 |
| C | 9.6329670   | 5.2394850  | -0.5749310 |
| H | 9.5965070   | 6.3374160  | -0.5612450 |
| C | 10.9693700  | -4.1215390 | -1.0655910 |
| C | 12.1588510  | -3.4100830 | -1.1908010 |
| H | 13.1050590  | -3.9439650 | -1.3522390 |
| H | 10.9628560  | -5.2181370 | -1.1277610 |
| H | -12.1801090 | 4.8460840  | -0.6786830 |
| H | -13.4062300 | 2.6653180  | -0.8558350 |
| H | -13.4142580 | 0.1963050  | -0.9158090 |
| H | -13.3916090 | -1.7937780 | -0.9666190 |
| H | 11.7600980  | 5.1402650  | -0.8551330 |
| H | 13.0414190  | 2.9908530  | -1.0652240 |
| H | 13.1101190  | 0.5233720  | -1.1394200 |
| H | 13.1281110  | -1.4707270 | -1.2264150 |

|   |            |            |            |
|---|------------|------------|------------|
| C | 1.1440590  | -5.7459640 | -0.0165120 |
| O | 1.6043190  | -6.3194520 | -0.9651990 |
| O | 0.5969300  | -6.4566630 | 1.0054280  |
| H | 0.2535970  | -5.8461950 | 1.6718610  |
| O | -0.2311680 | 2.1448780  | 2.5156560  |
| H | 0.6048740  | 1.7888940  | 2.8426400  |
| H | -0.2025520 | 6.0447460  | 0.5245790  |
| O | -0.2901210 | -2.3466840 | 2.3423690  |
| H | 0.6041590  | -2.6062570 | 2.6462270  |
| N | 2.5070900  | -2.3892690 | 2.4095370  |
| C | 3.5197960  | -3.3387900 | 2.8889230  |
| H | 3.3918740  | -4.3121600 | 2.4228180  |
| H | 4.5500520  | -2.9972470 | 2.7170320  |
| H | 3.3791760  | -3.4545350 | 3.9660590  |
| C | 2.5952100  | -1.1523270 | 3.2039090  |
| H | 1.7715970  | -0.4851040 | 2.9620990  |
| H | 2.4963840  | -1.4282060 | 4.2562140  |
| H | 3.5461280  | -0.6184940 | 3.0774320  |
